# Supplementary material for: Design, Synthesis and Biological Evaluation of 1,3,5-Triazine Derivatives Targeting hA1 and hA3 Adenosine Receptor
Source: MDPI journal article supplement (doi:10.3390/molecules27134016), 2022-06-22

## Supplementary Materials

### Design, Synthesis, and Biological Evaluation of 1,3,5-Triazine Derivatives Targeting hA<sub>1</sub> and hA<sub>3</sub> Adenosine Receptor

Sujin Park <sup>1,2</sup>, Yujin Ahn <sup>3,4</sup>, Yongchan Kim <sup>2</sup>, Eun Joo Roh <sup>2</sup>, Yoonji Lee <sup>5</sup>,  
Chaebin Han <sup>1,2</sup>, Hee Min Yoo <sup>3,4,\*</sup> and Jinha Yu <sup>1,\*</sup>

<sup>1</sup> Department of Pharmacy, College of Pharmacy and Graduate School of Pharmaceutical Sciences, Ewha Womans University, Seoul 03760, Korea

<sup>2</sup> Biomedical Research Institute, Korea Institute of Science and Technology (KIST), Seoul 02792, Korea

<sup>3</sup> Biometrology Group, Korea Research Institute of Standards and Science (KRISS), Daejeon 34113, Korea

<sup>4</sup> Department of Precision Measurement, University of Science and Technology (UST), Daejeon 34113, Korea; <sup>5</sup> College of Pharmacy, Chung-Ang University, Seoul 06974, Korea

**Figure S1.** <sup>1</sup>H and <sup>13</sup>C NMR Copies of Compound **9a-g**, and **11a-i**

**Figure S2.** HR-MS Copies of Compound **9a-g**, and **11a-i**

**Figure S3.** Molecular Docking of Compound **9a**, **11a**, and **11b**

**Figure S1.  $^1\text{H}$  and  $^{13}\text{C}$  NMR Copies of compound **9a-g** and **11a-i****

4-(4-Amino-6-((3-fluoro-4-methoxyphenyl)amino)-1,3,5-triazin-2-yl)phenol (**9a**)

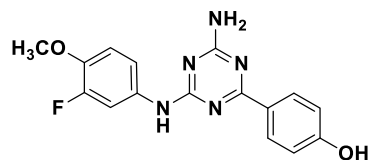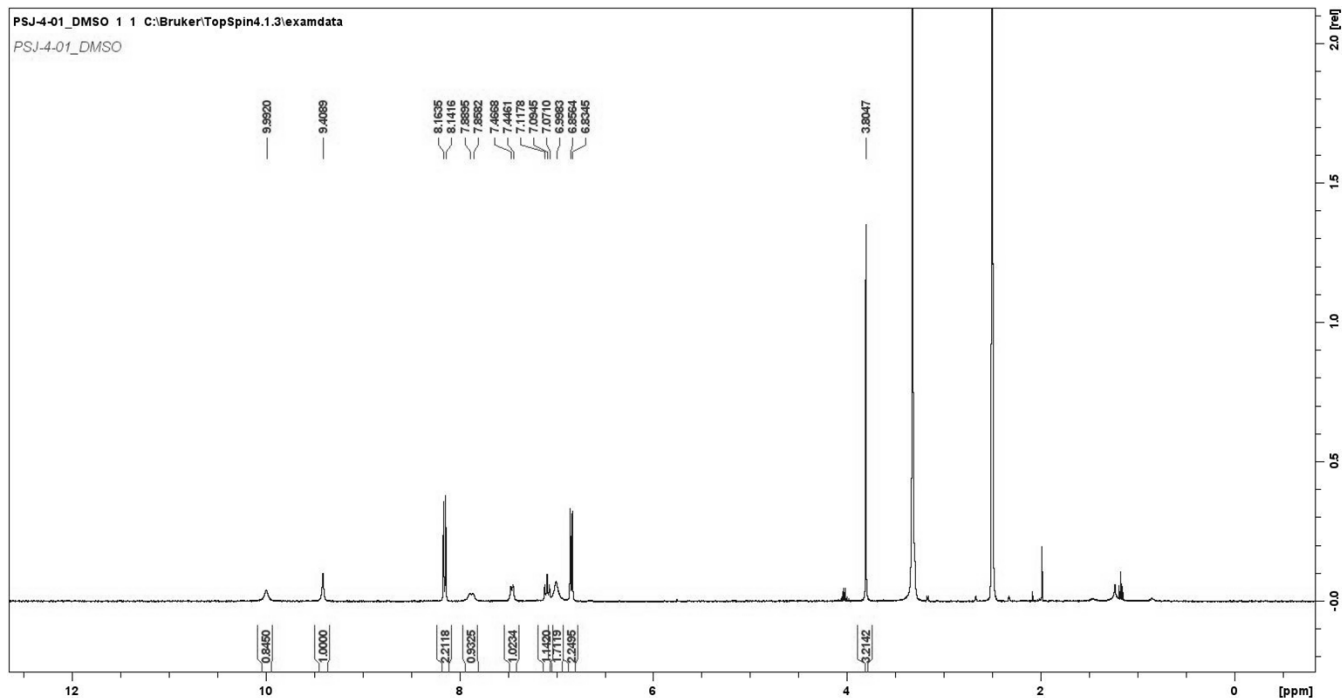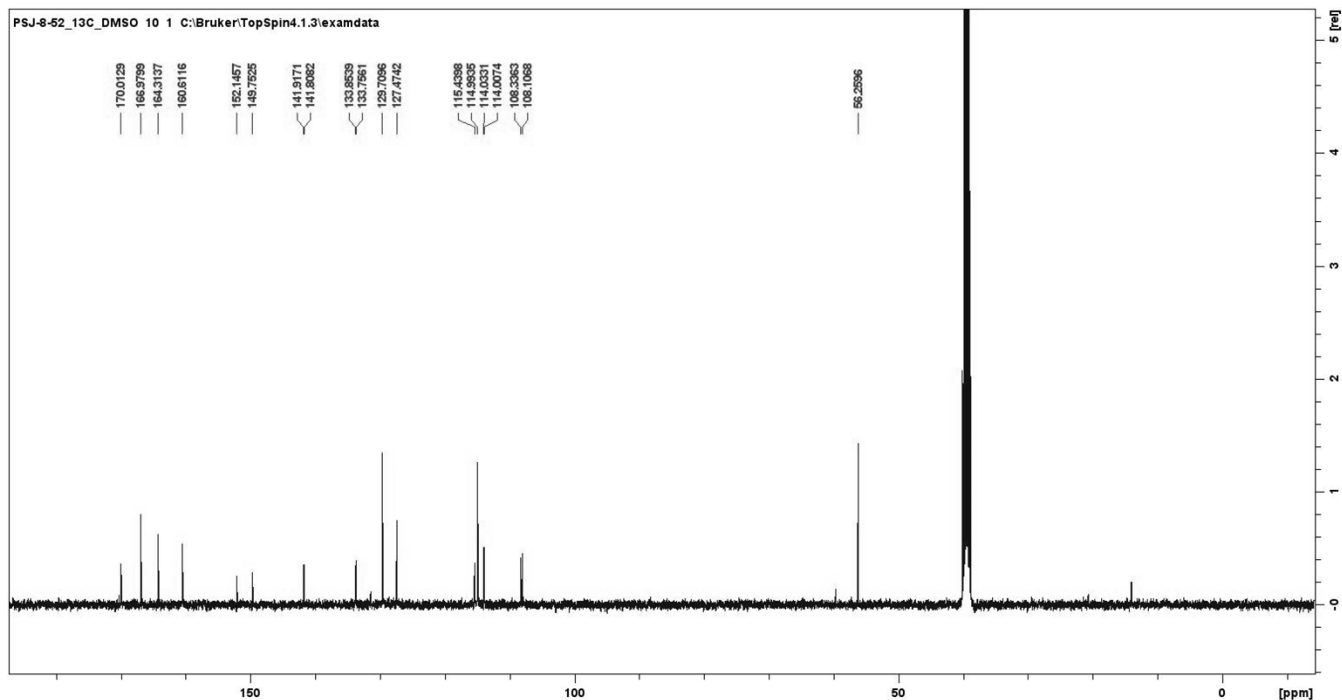

# 4-(4-Amino-6-((3,5-dimethoxyphenyl)amino)-1,3,5-triazin-2-yl)phenol (**9b**)

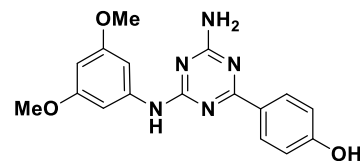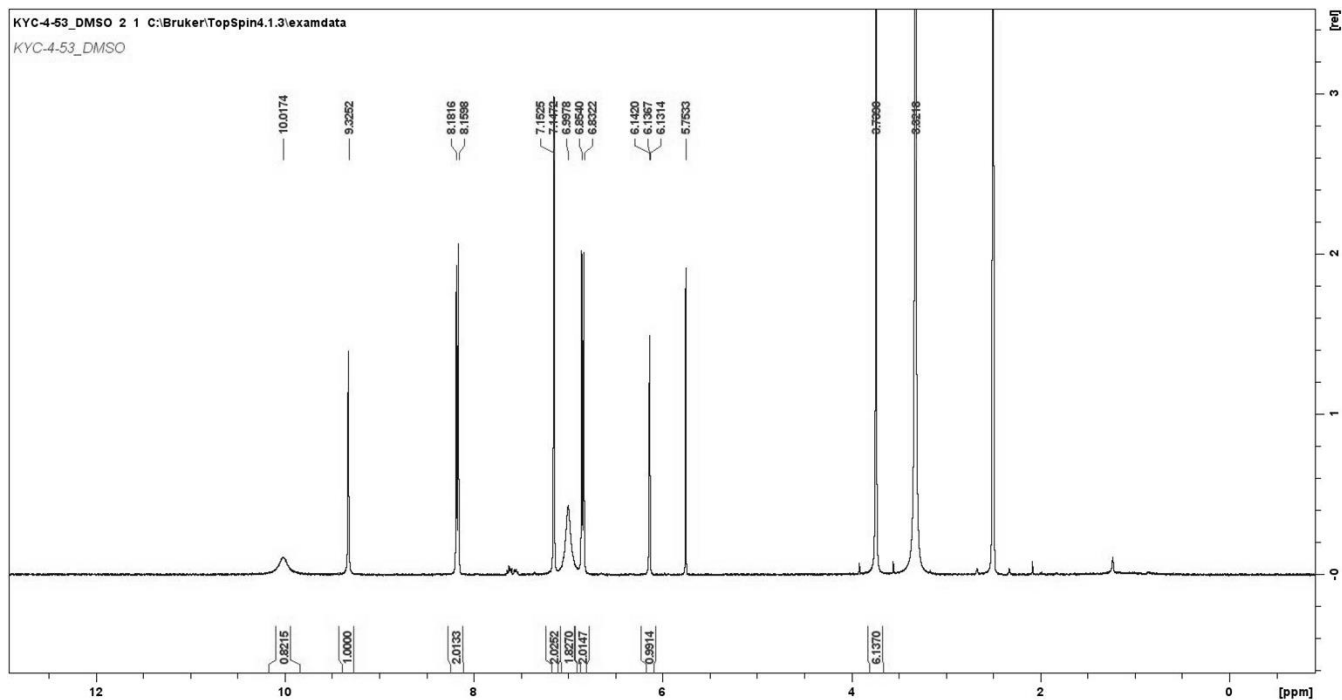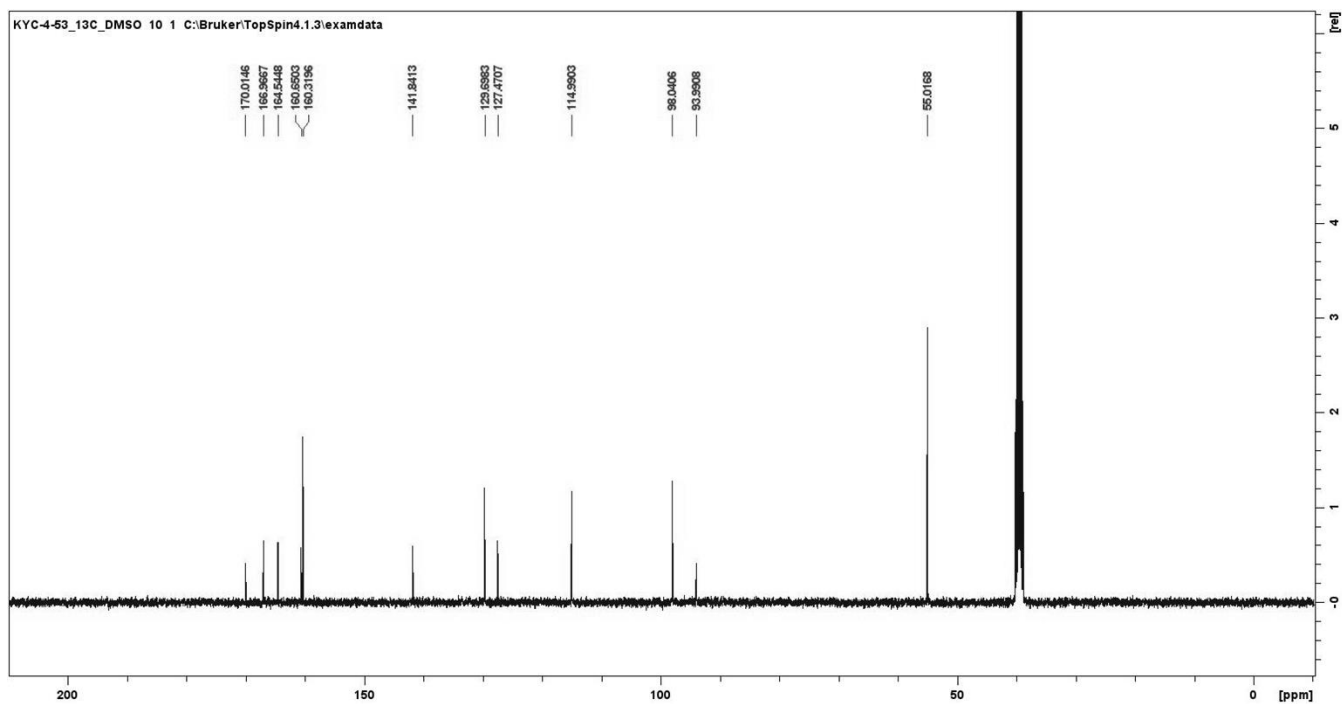

# 4-(4-Amino-6-((4-chloro-3-methoxyphenyl)amino)-1,3,5-triazin-2-yl)phenol (**9c**)

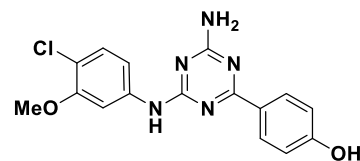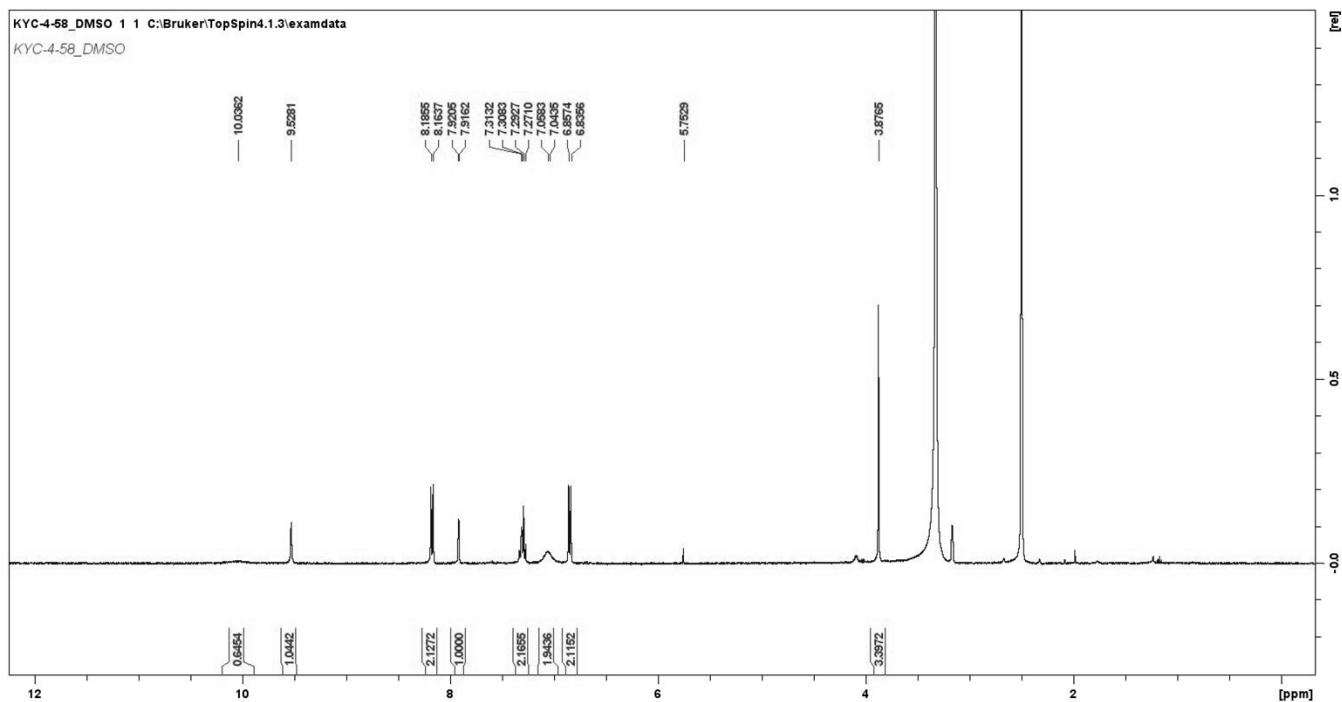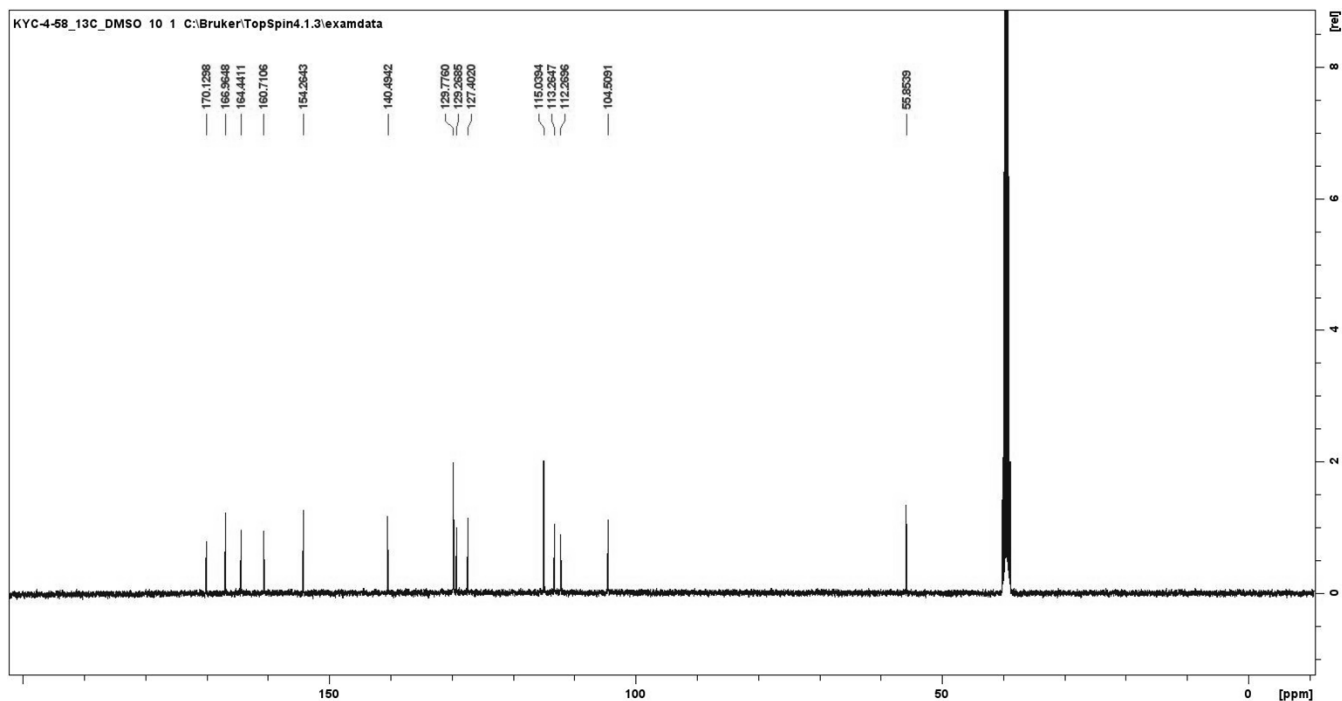

4-(4-Amino-6-((3-(trifluoromethyl)phenyl)amino)-1,3,5-triazin-2-yl)phenol (**9d**)

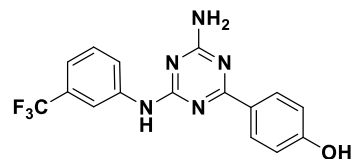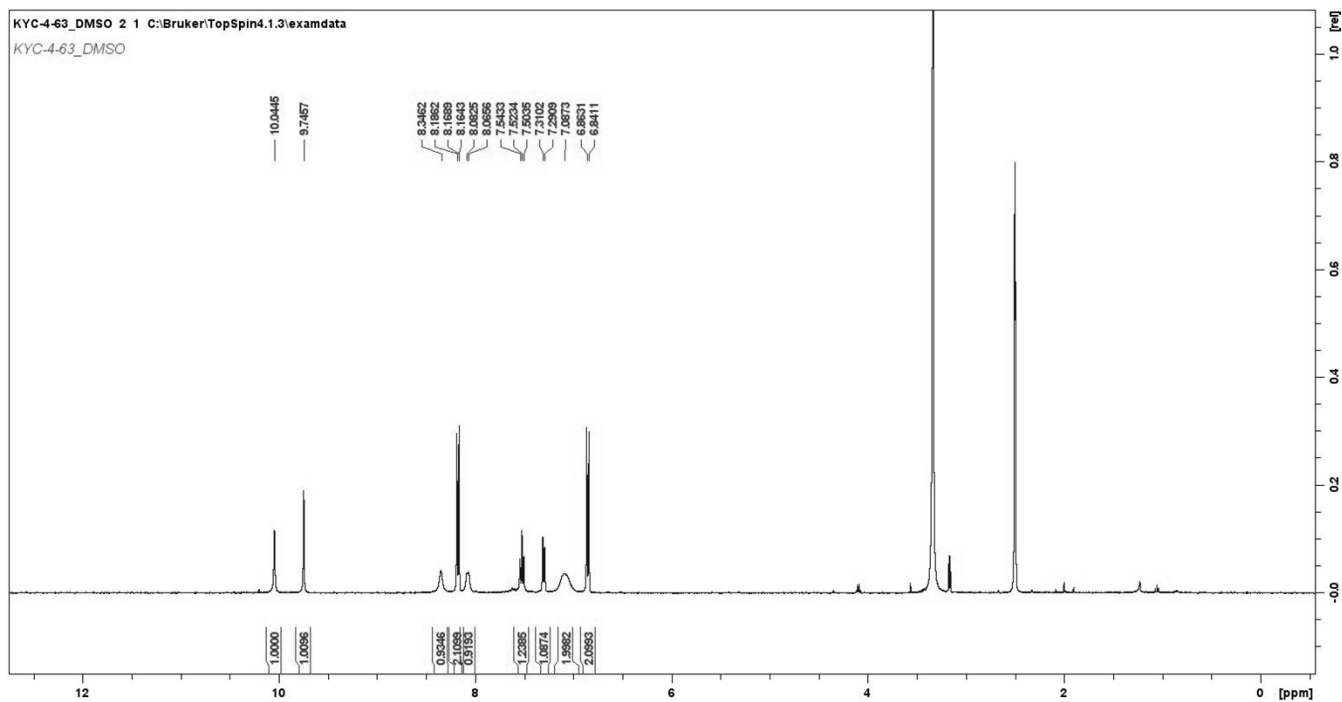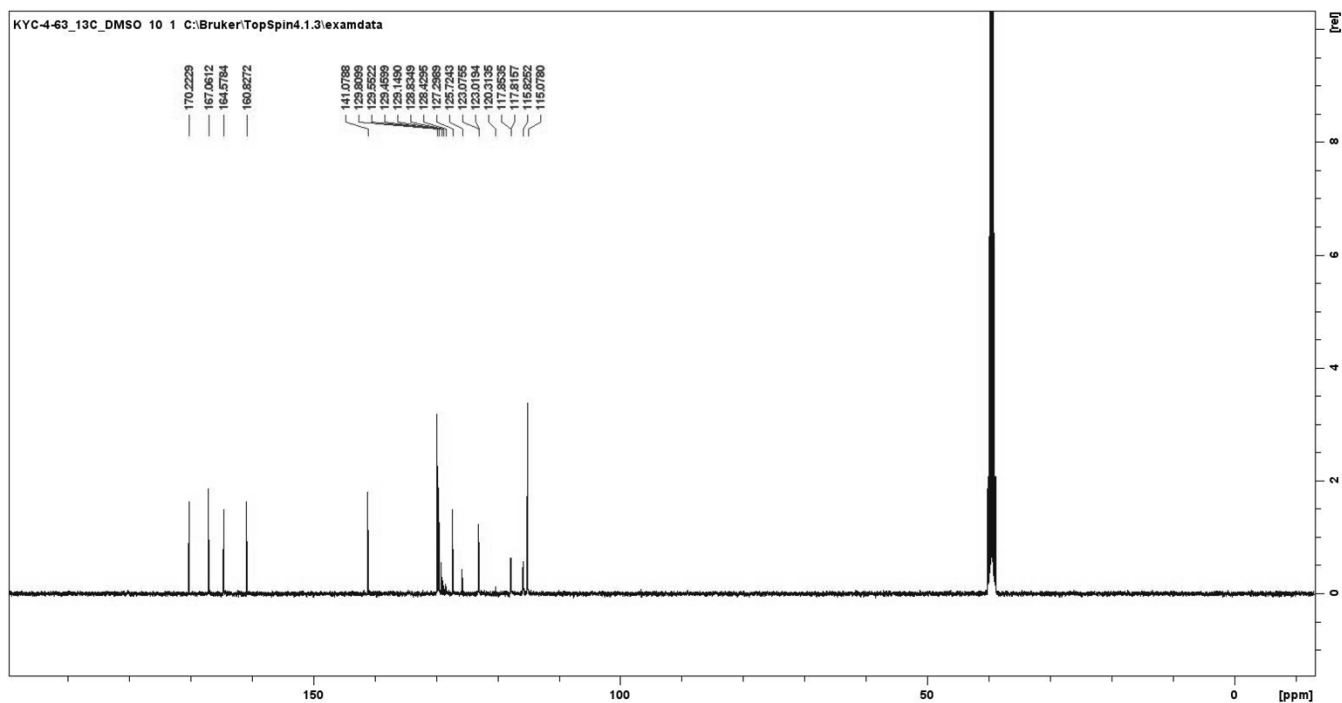

# 4-(4-Amino-6-((3,5-dimethylphenyl)amino)-1,3,5-triazin-2-yl)phenol (**9e**)

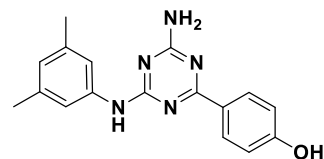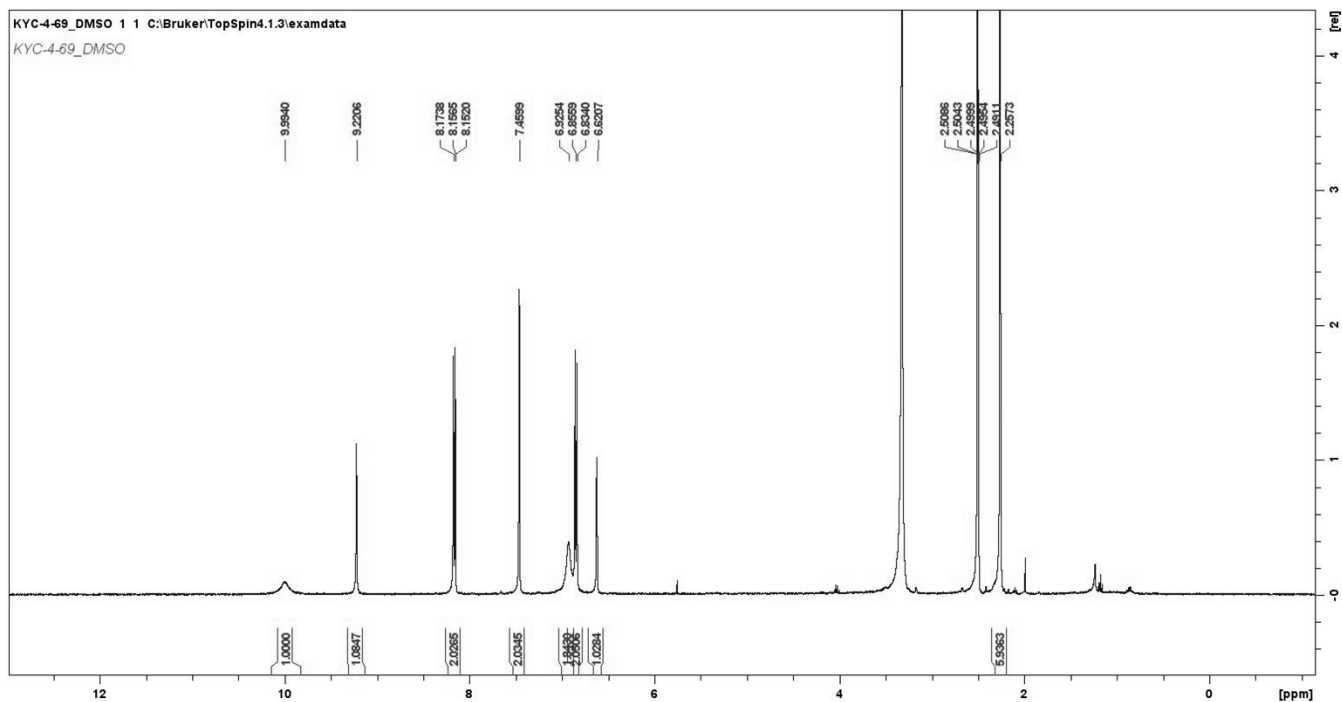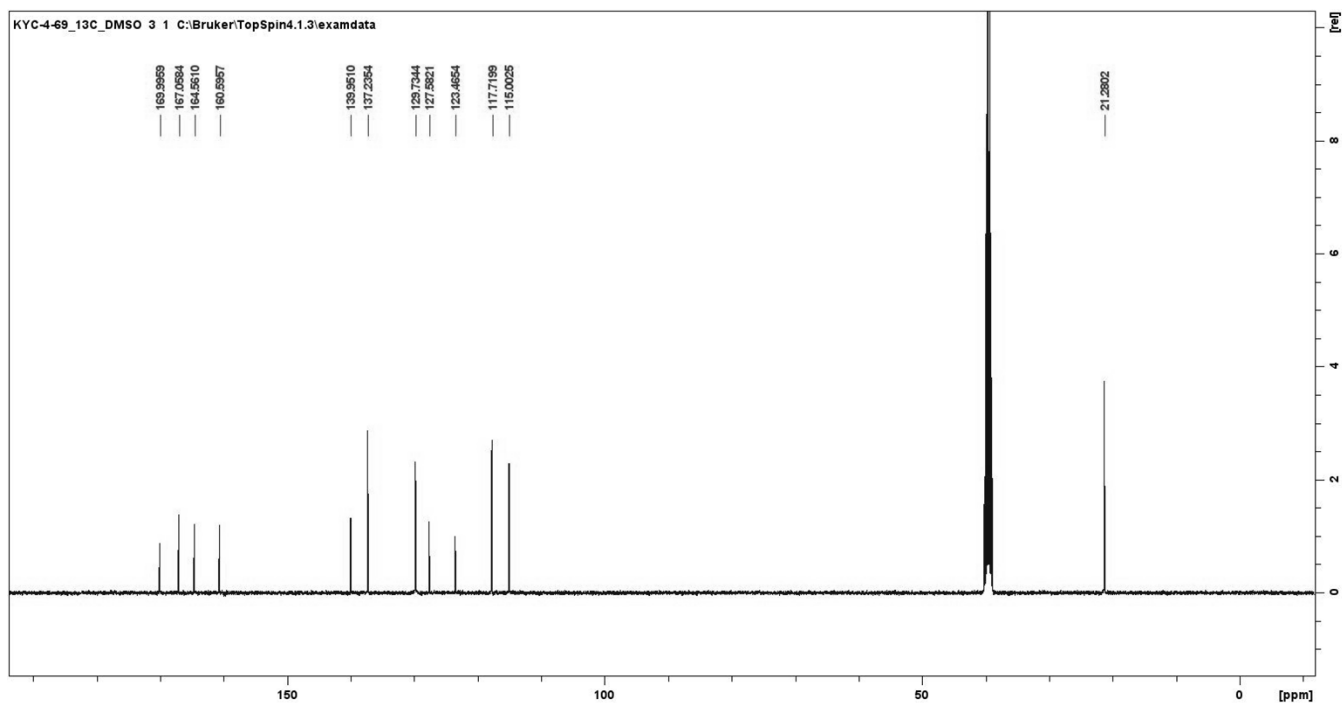

# 4-(4-Amino-6-((4-(piperidin-1-yl)phenyl)amino)-1,3,5-triazin-2-yl)phenol (**9f**)

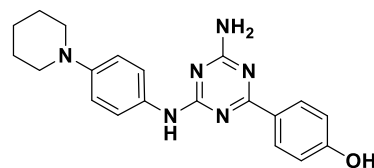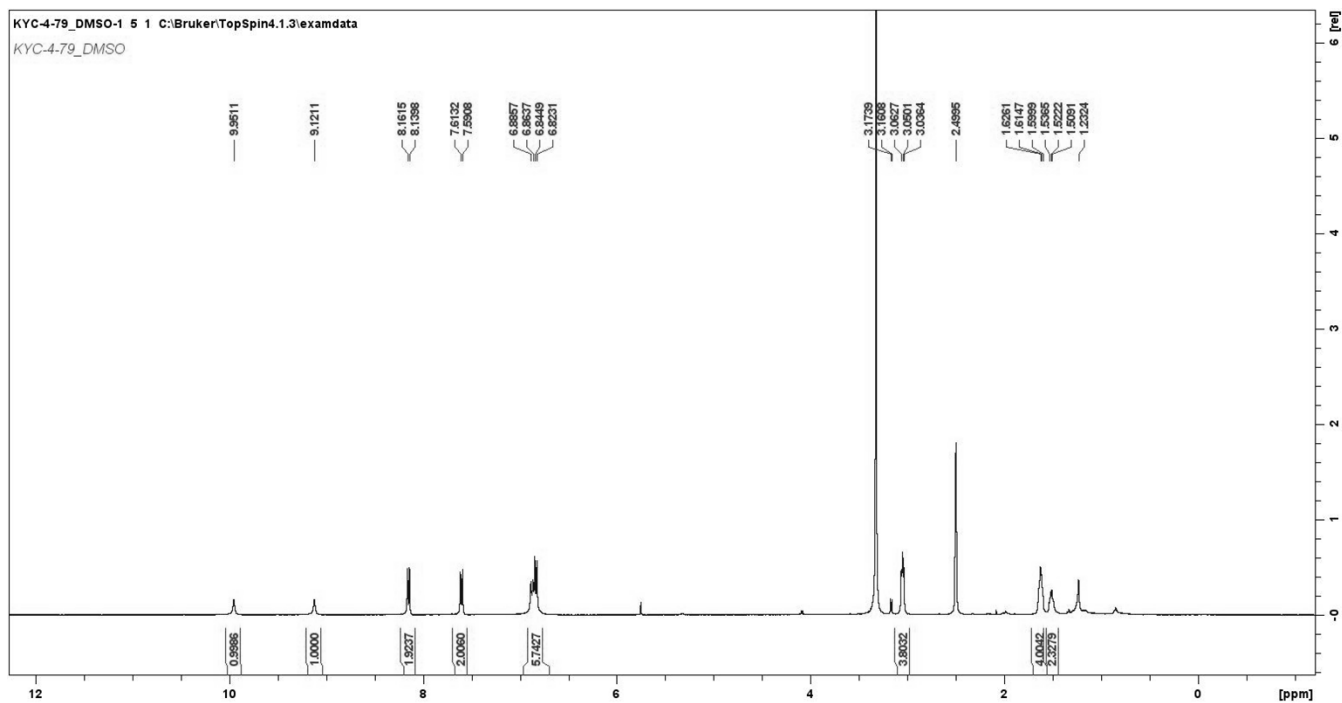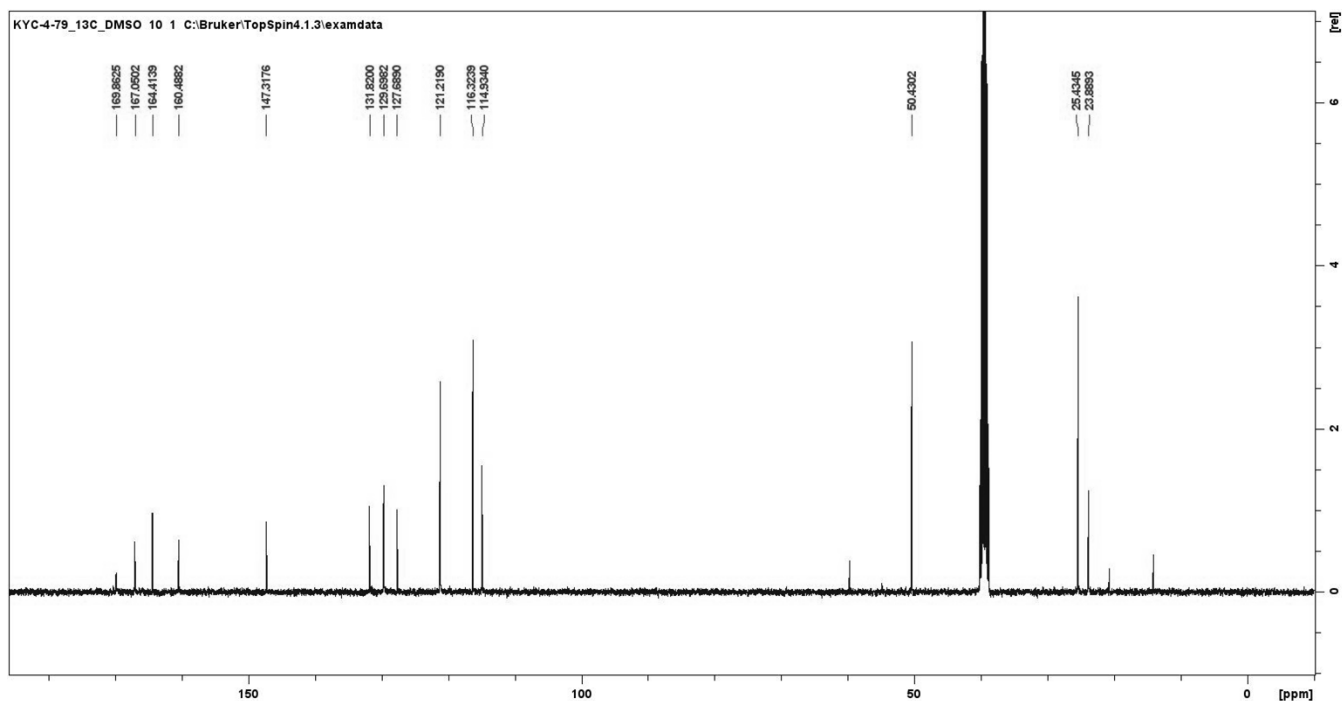

# 4-(4-Amino-6-((2,4-dimethylphenyl)amino)-1,3,5-triazin-2-yl)phenol (**9g**)

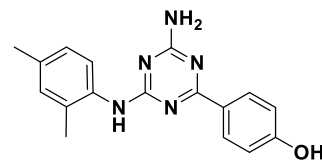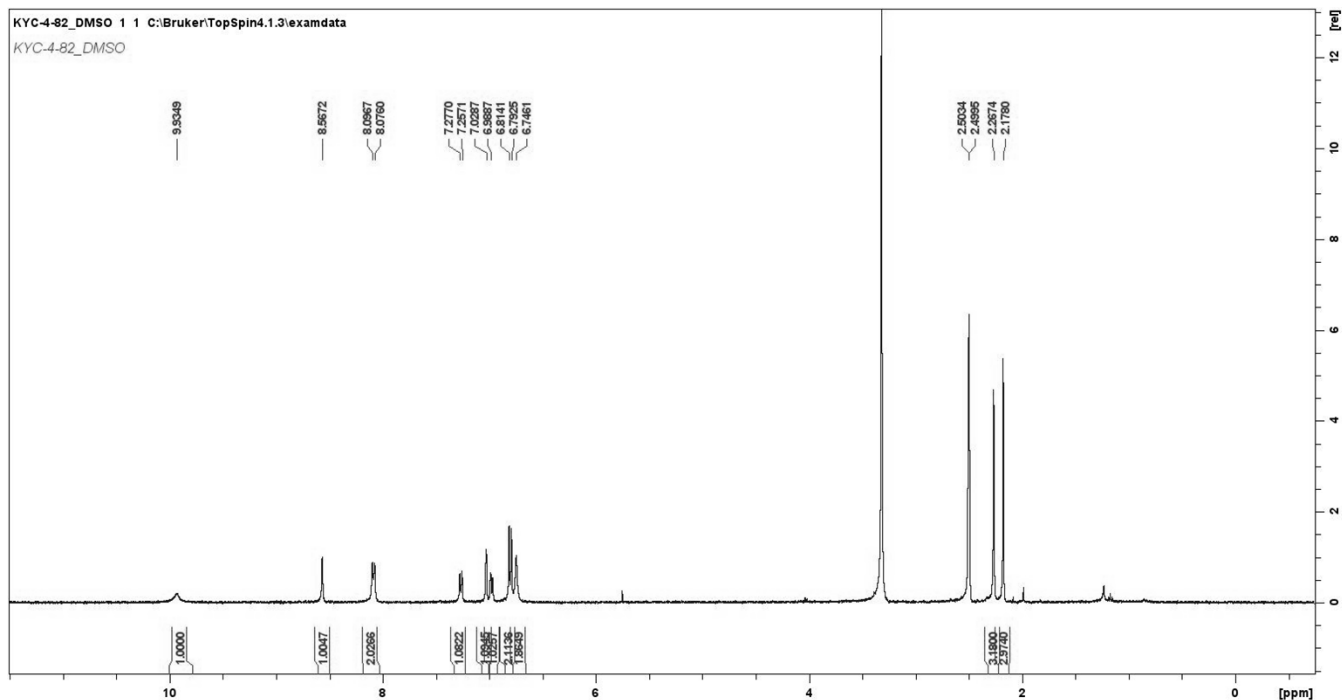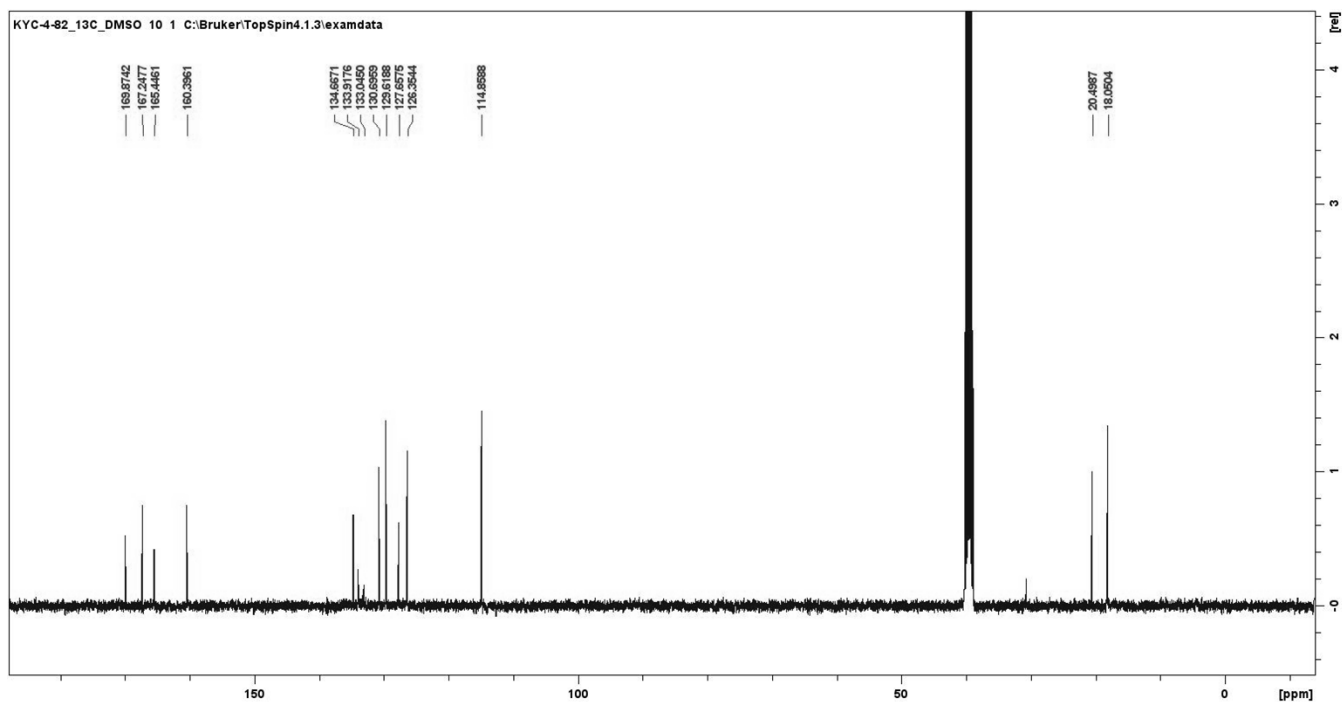



# $N^2$ -(3-Fluoro-4-methoxyphenyl)-6-(4-methoxyphenyl)-1,3,5-triazine-2,4-diamine (**11a**)

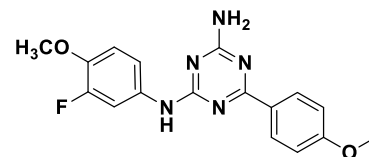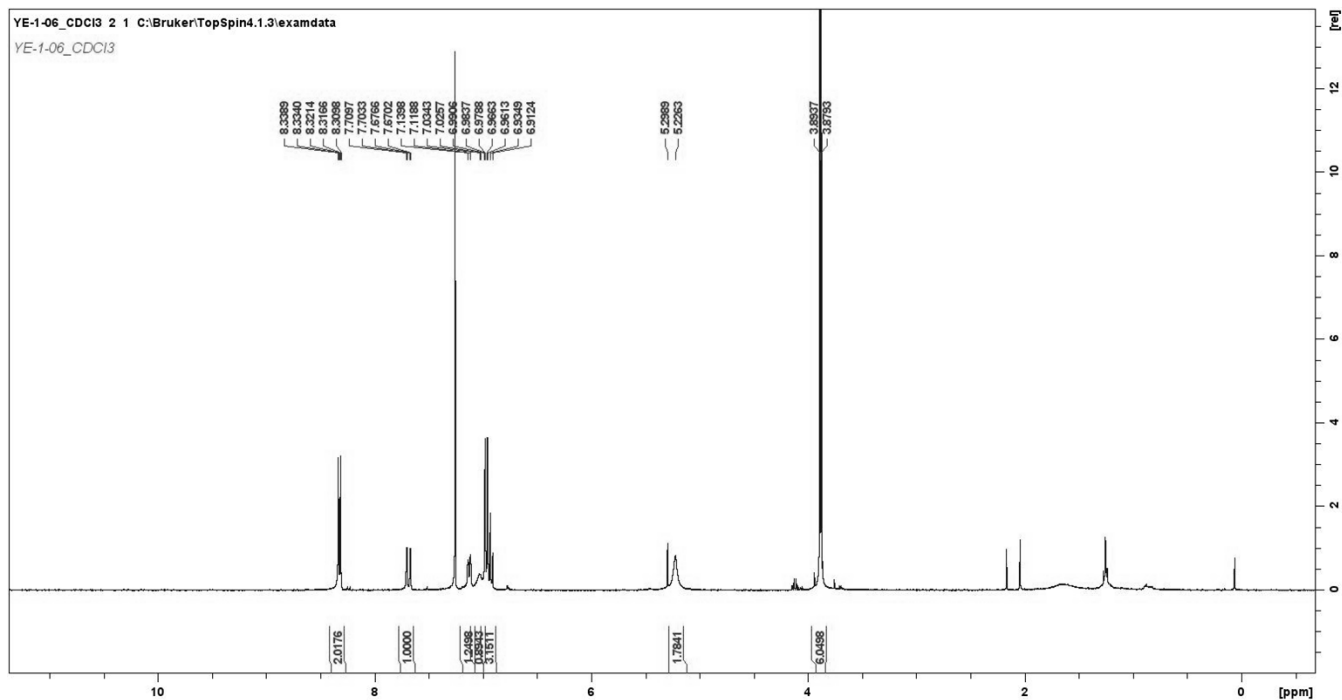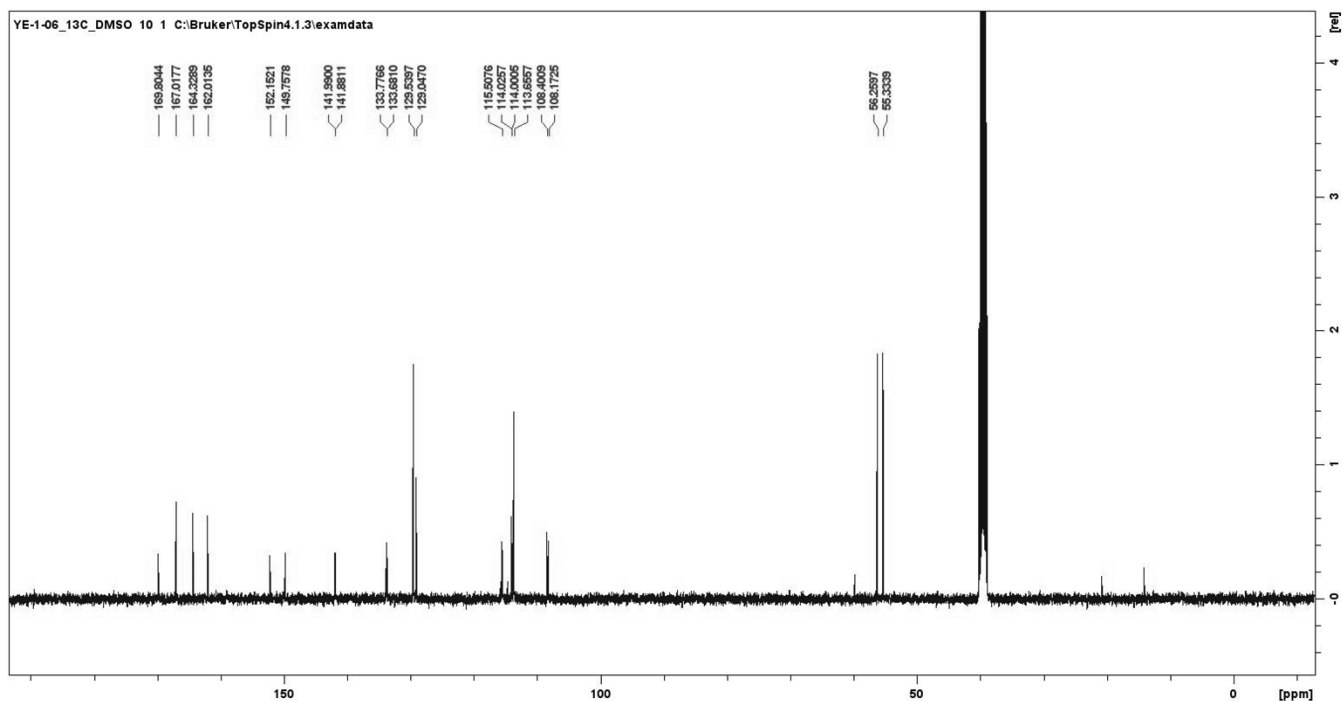

# $N^2$ -(3-Fluoro-4-methoxyphenyl)-6-(4-fluorophenyl)-1,3,5-triazine-2,4-diamine (**11b**)

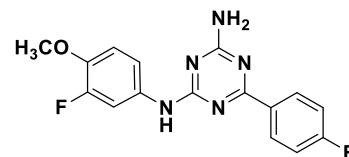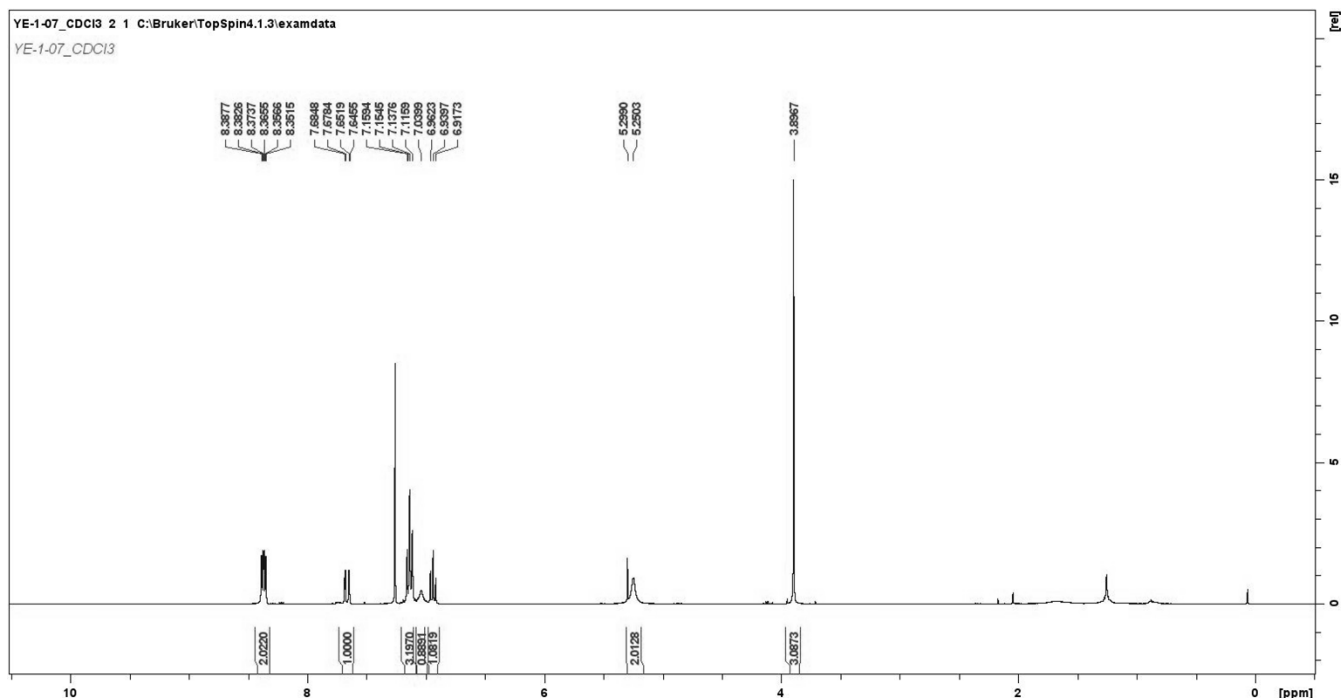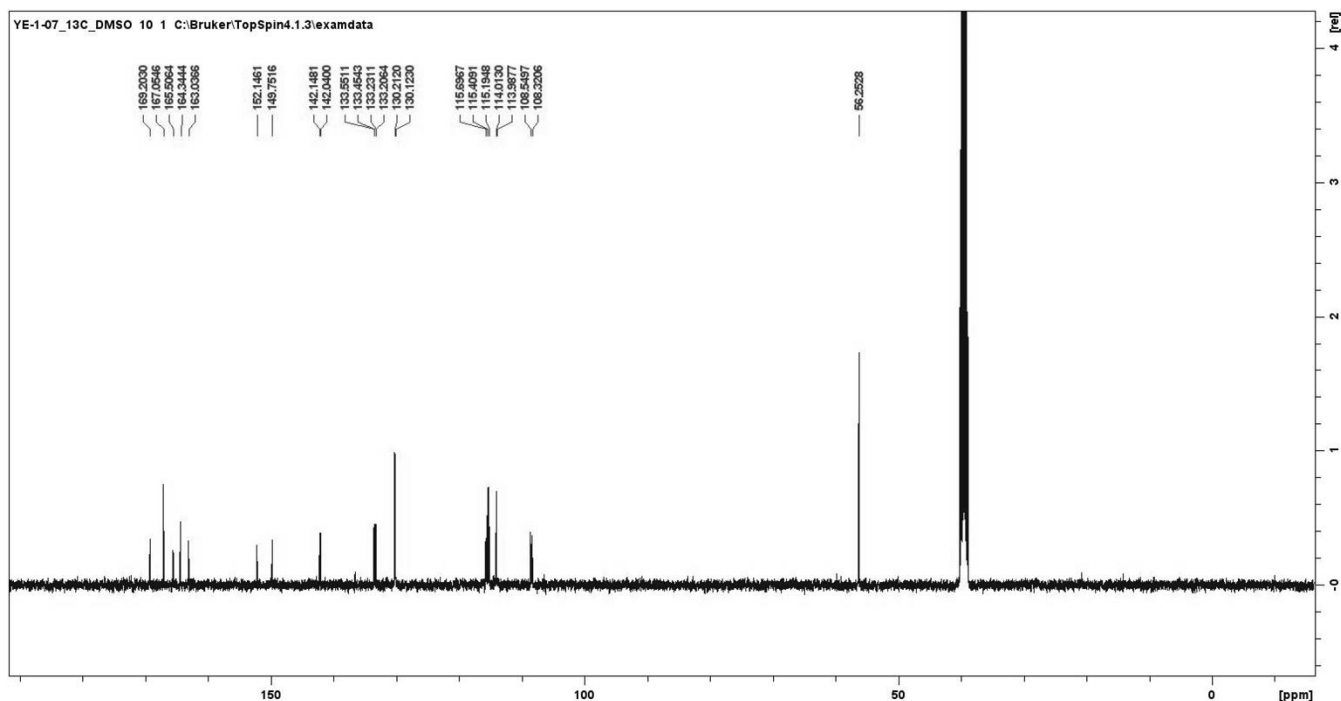

$N^2$ -(3-Fluoro-4-methoxyphenyl)-6-(4-(trifluoromethoxy)phenyl)-1,3,5-triazine-2,4-diamine (**11c**)

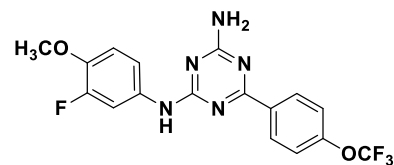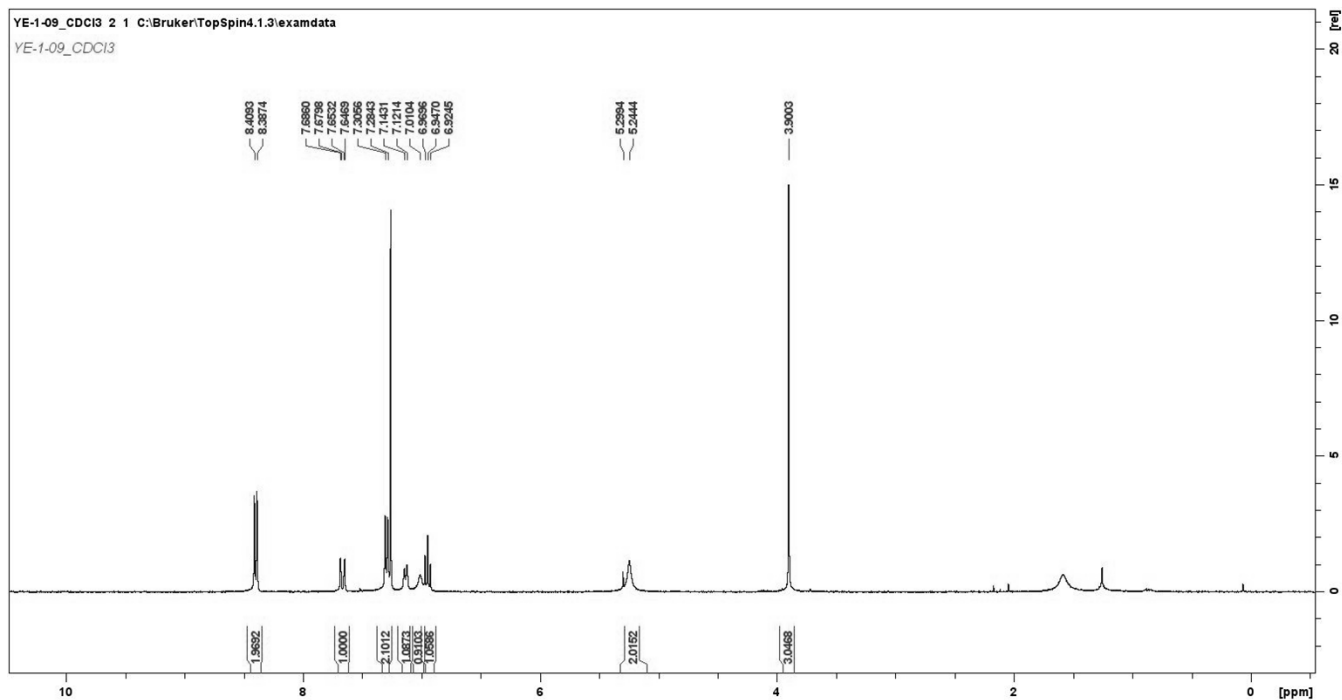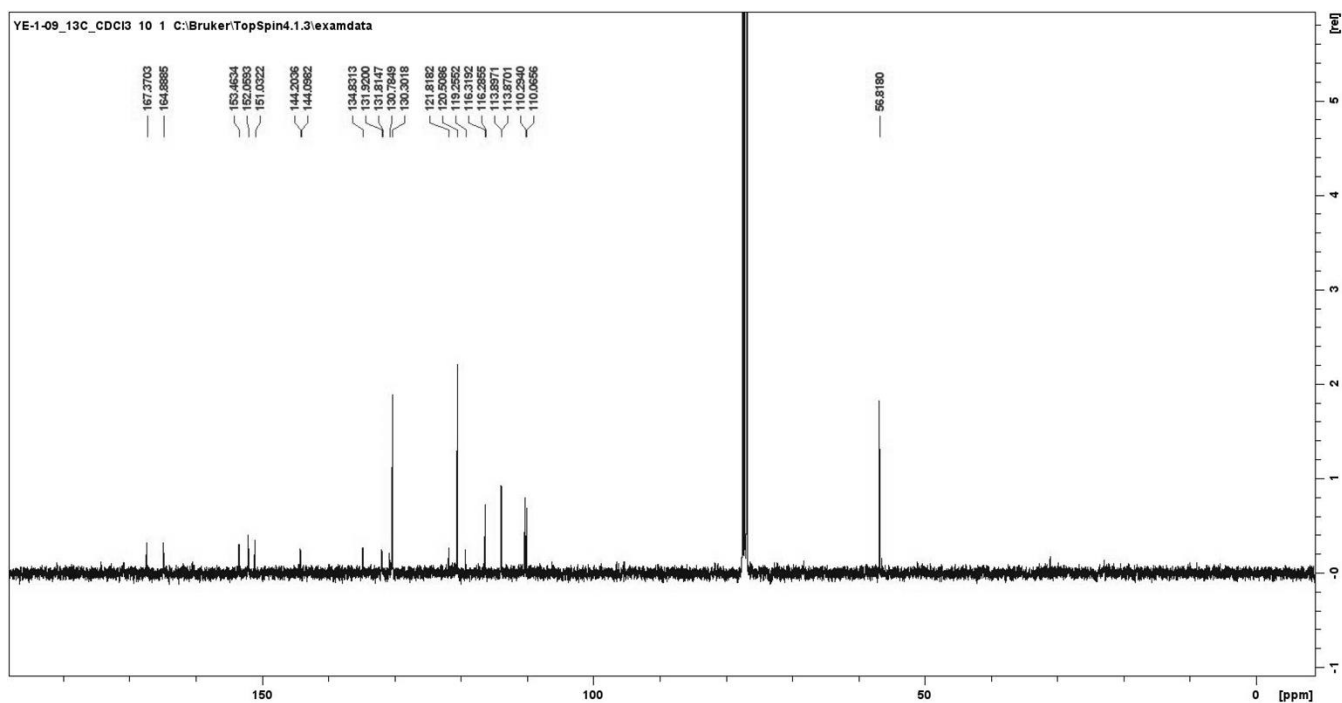

# $N^2$ -(3-Fluoro-4-methoxyphenyl)-6-(4-(trifluoromethyl)phenyl)-1,3,5-triazine-2,4-diamine (**11d**)

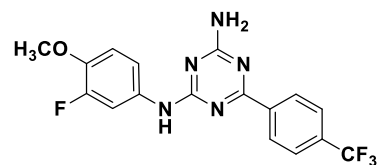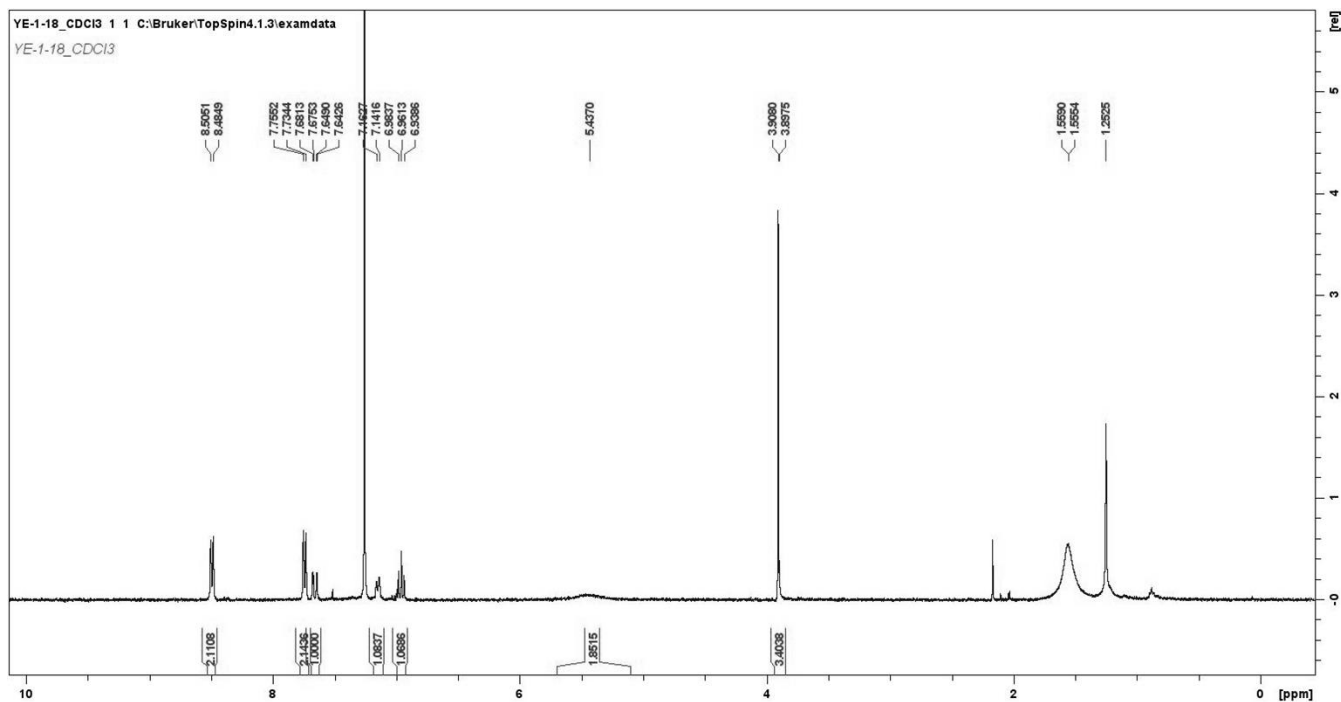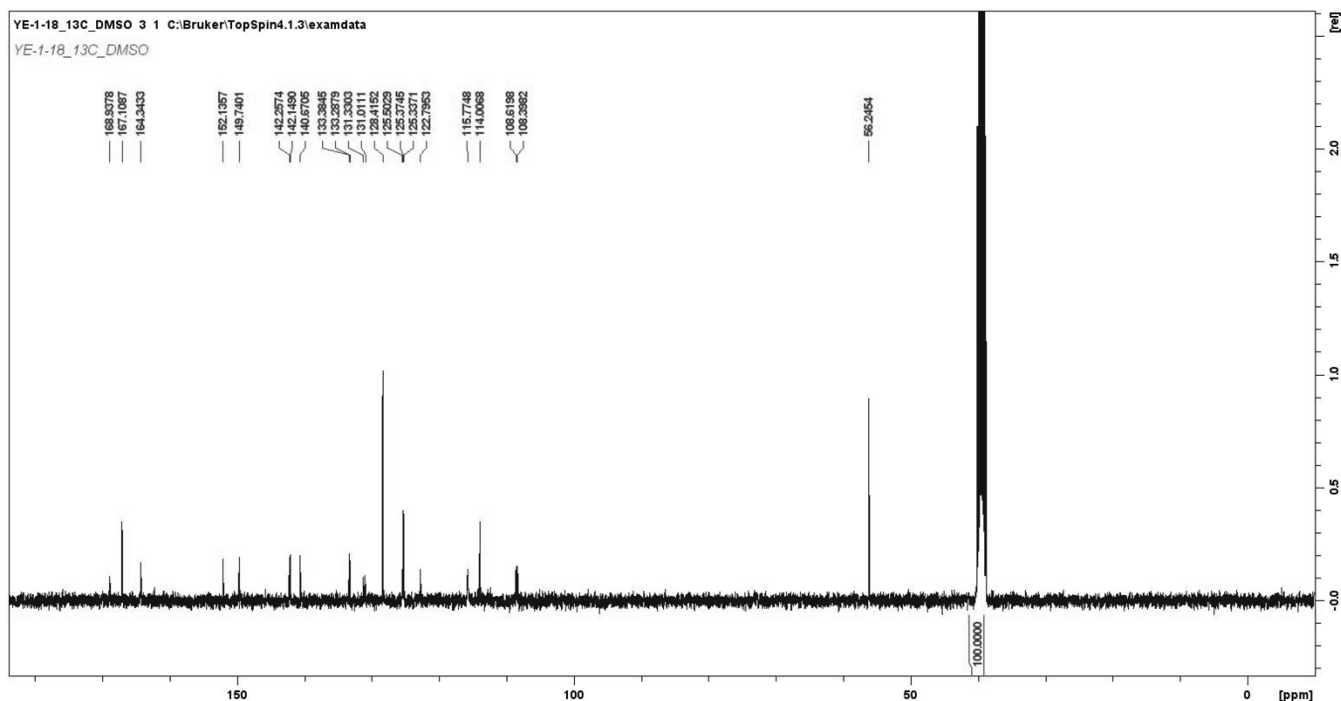

# 4-(4-Amino-6-((3-fluoro-4-methoxyphenyl)amino)-1,3,5-triazin-2-yl)benzonitrile (**11e**)

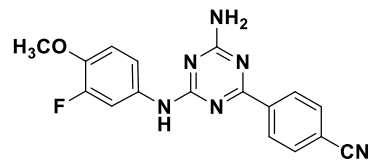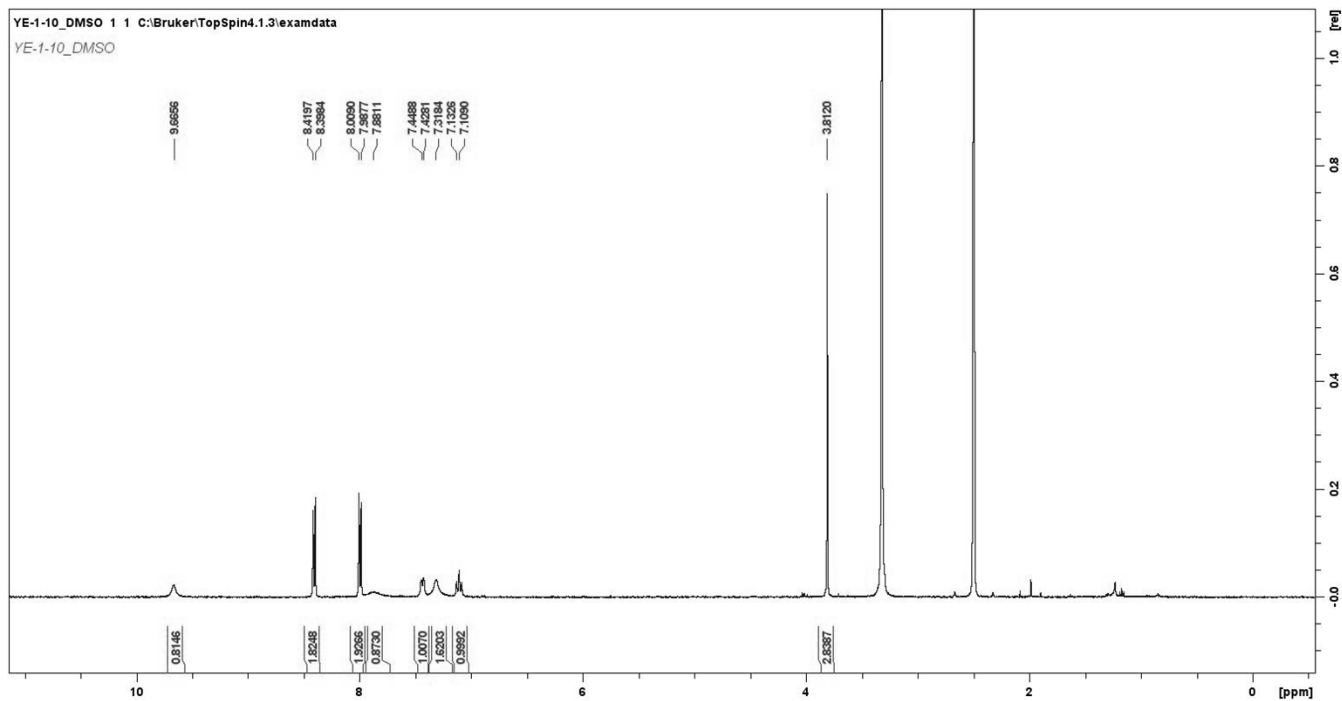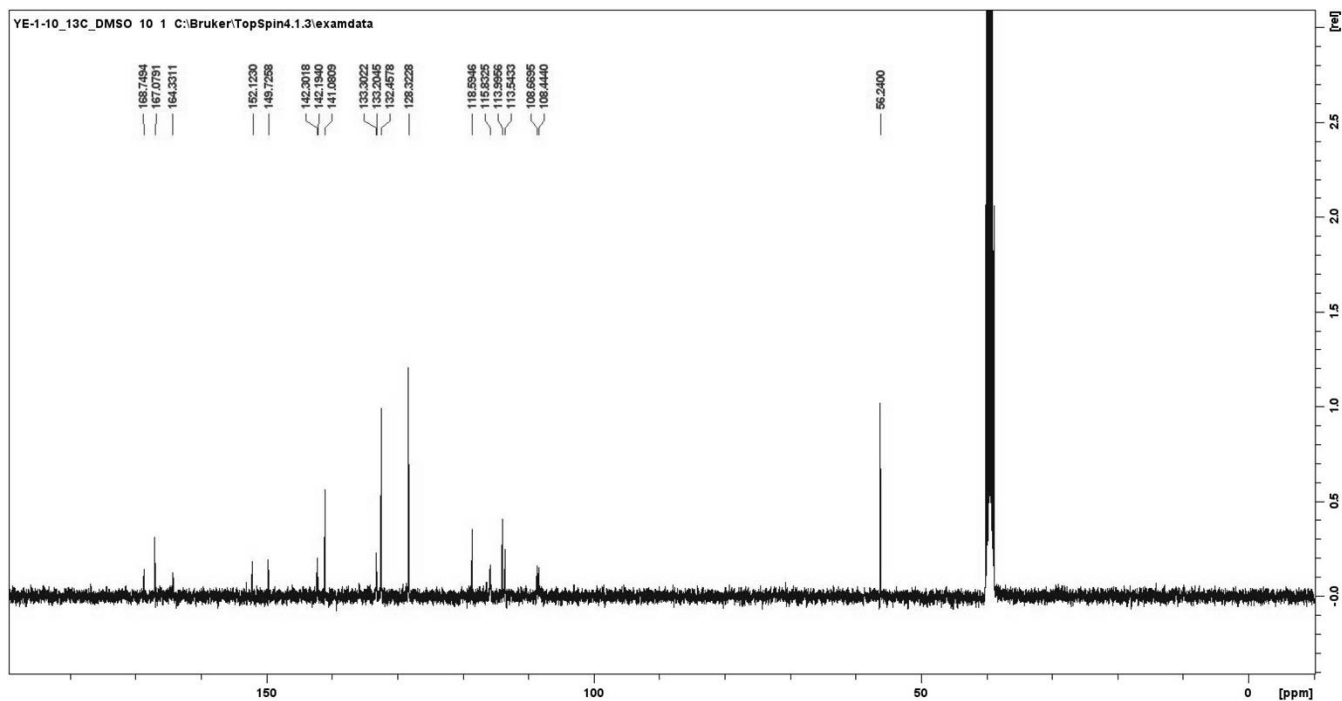

# Methyl 4-(4-Amino-6-((3-fluoro-4-methoxyphenyl)amino)-1,3,5-triazin-2-yl)benzoate (**11f**)

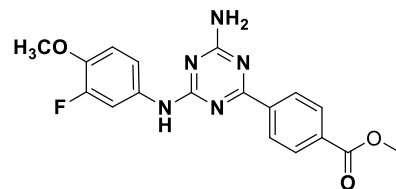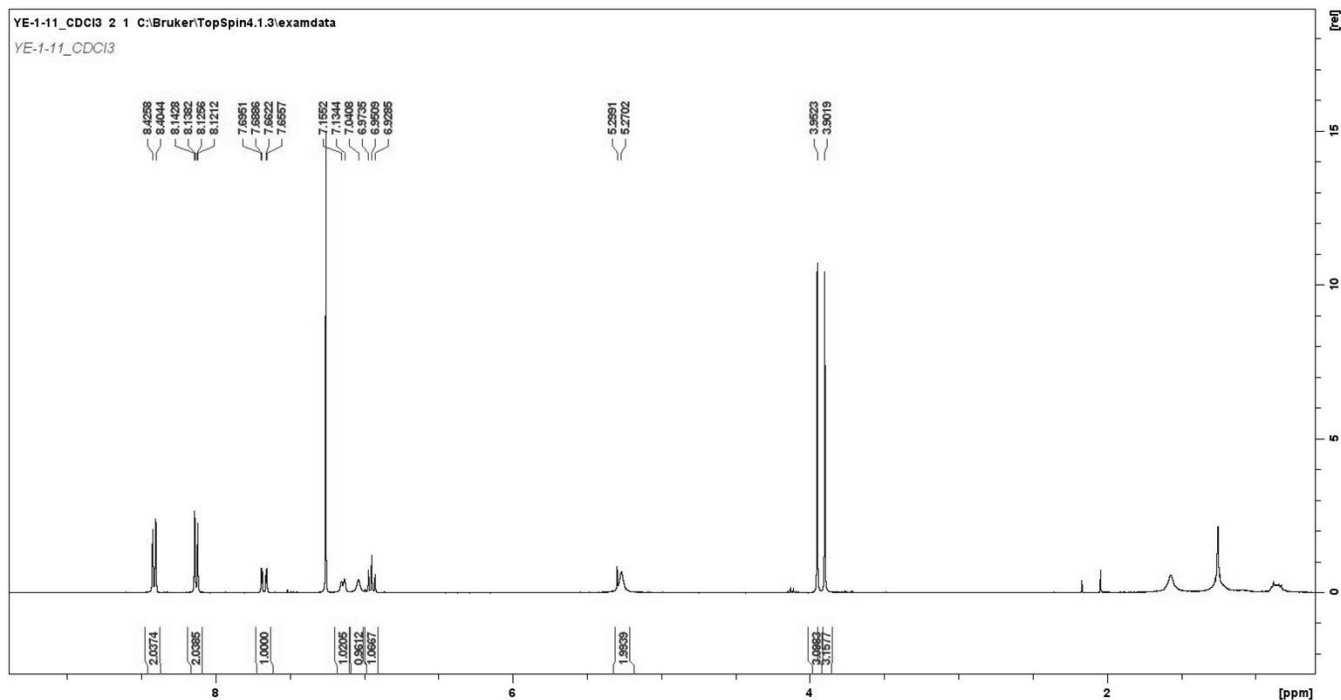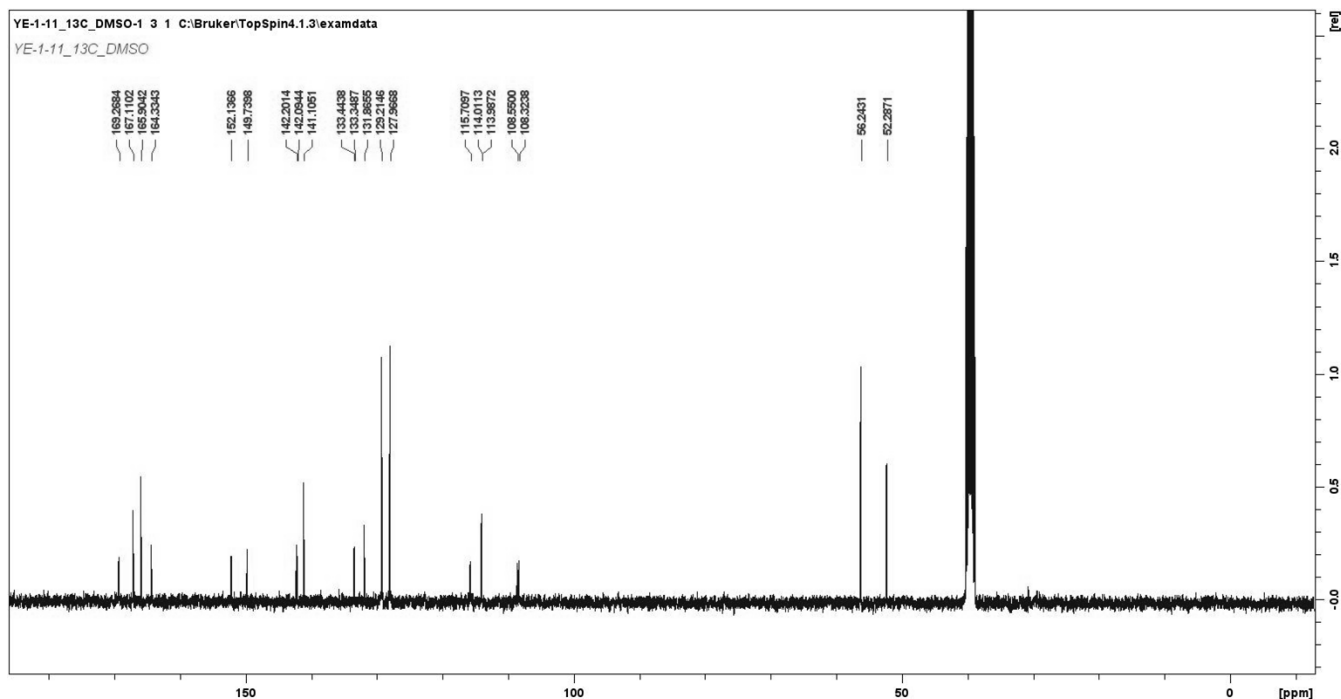

# Ethyl 4-(4-Amino-6-((3-fluoro-4-methoxyphenyl)amino)-1,3,5-triazin-2-yl)benzoate (**11g**)

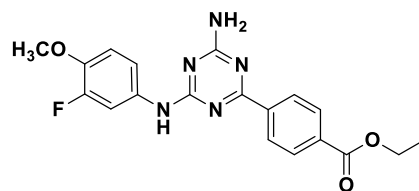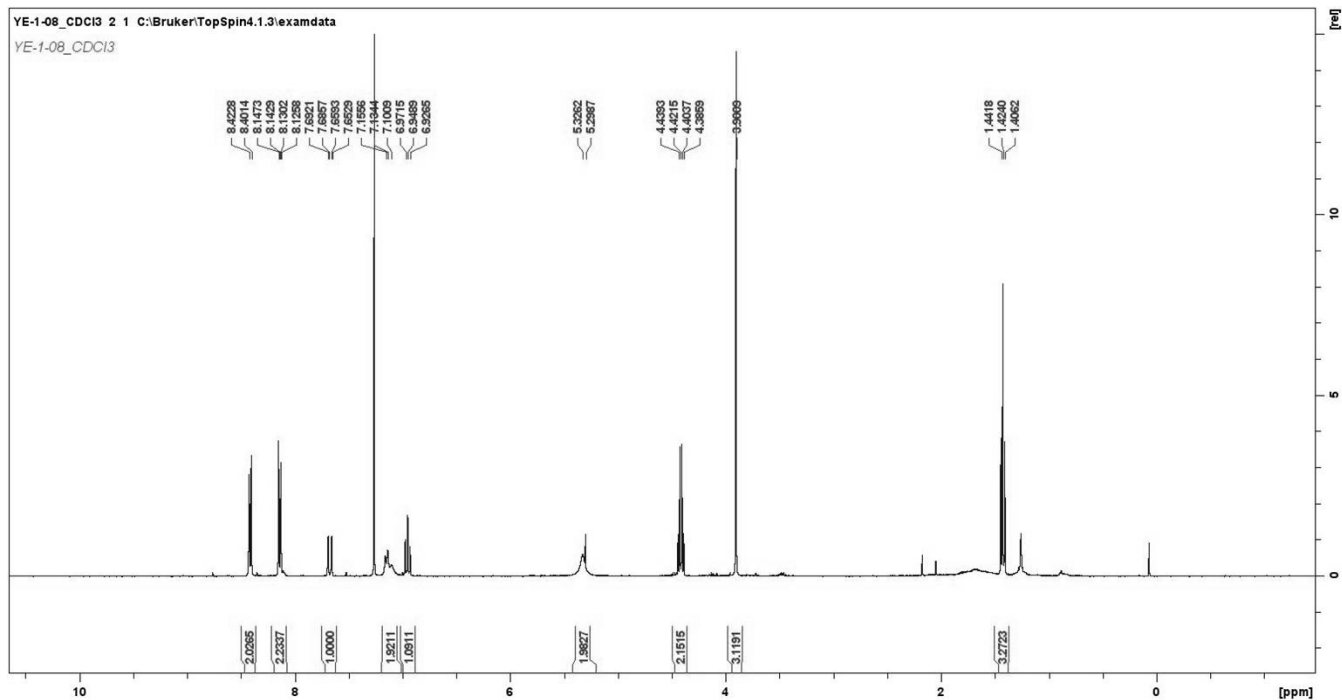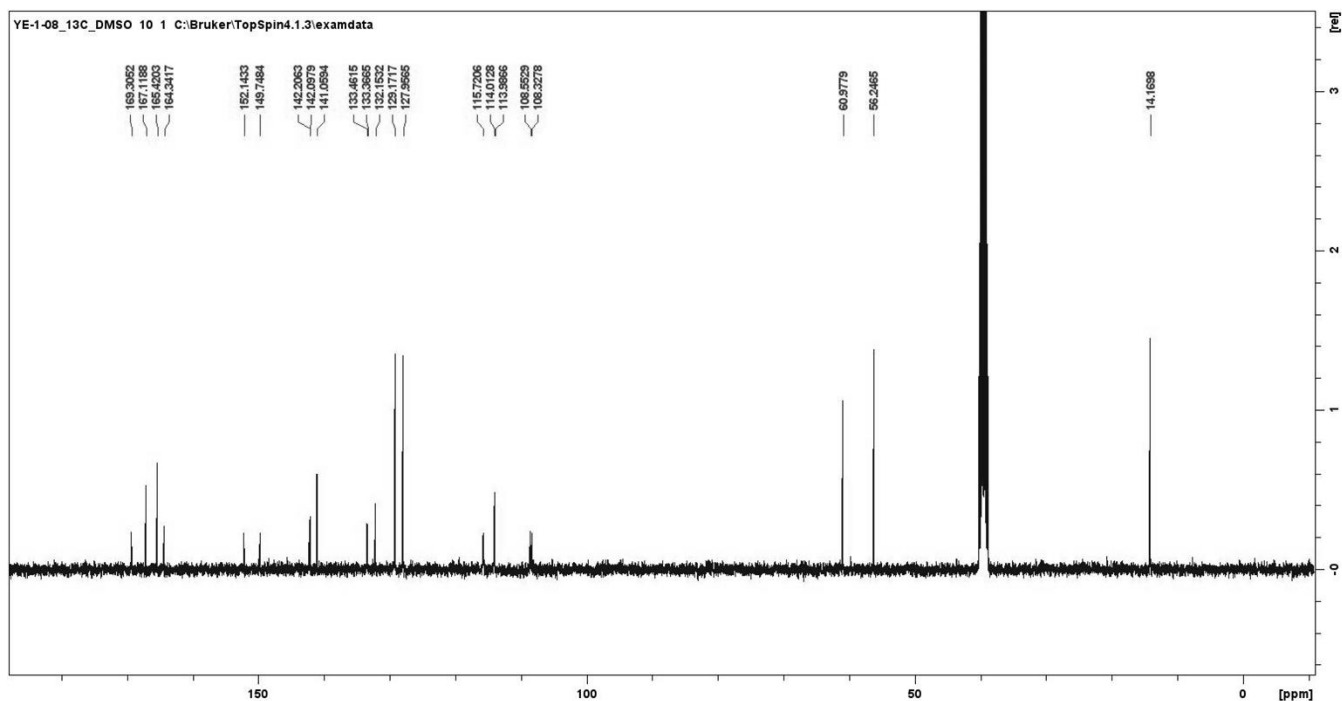

# 4-(4-Amino-6-((3-fluoro-4-methoxyphenyl)amino)-1,3,5-triazin-2-yl)-2,6-difluorophenol (**11h**)

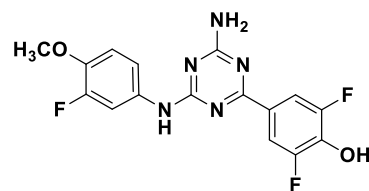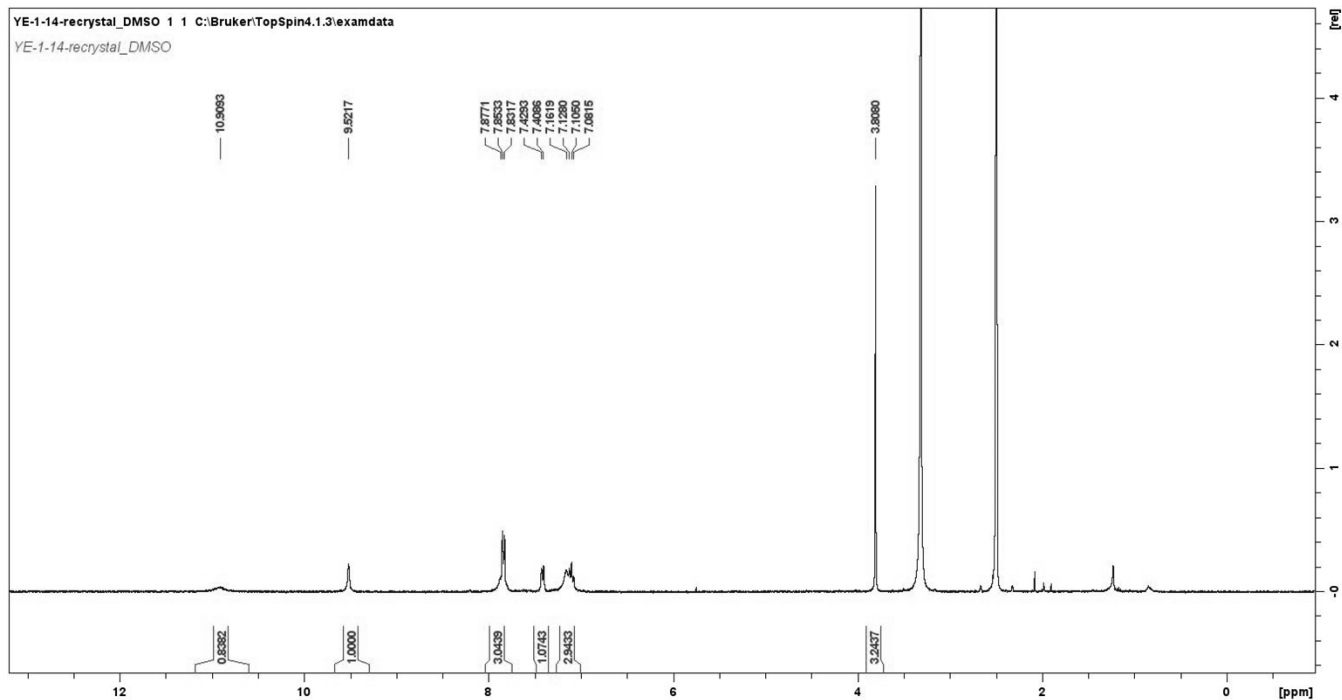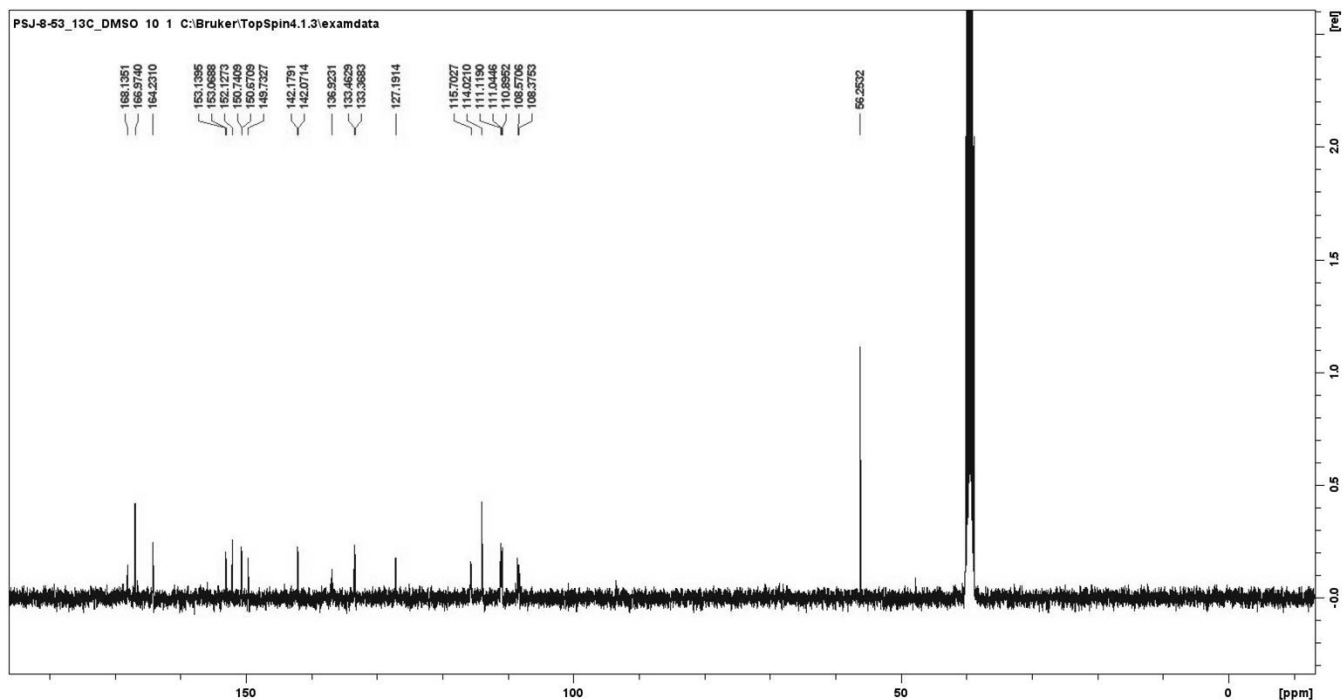



# 6-(4-Fluoro-3-nitrophenyl)-*N*<sup>2</sup>-(3-fluoro-4-methoxyphenyl)-1,3,5-triazine-2,4-diamine (**11i**)

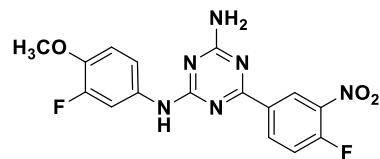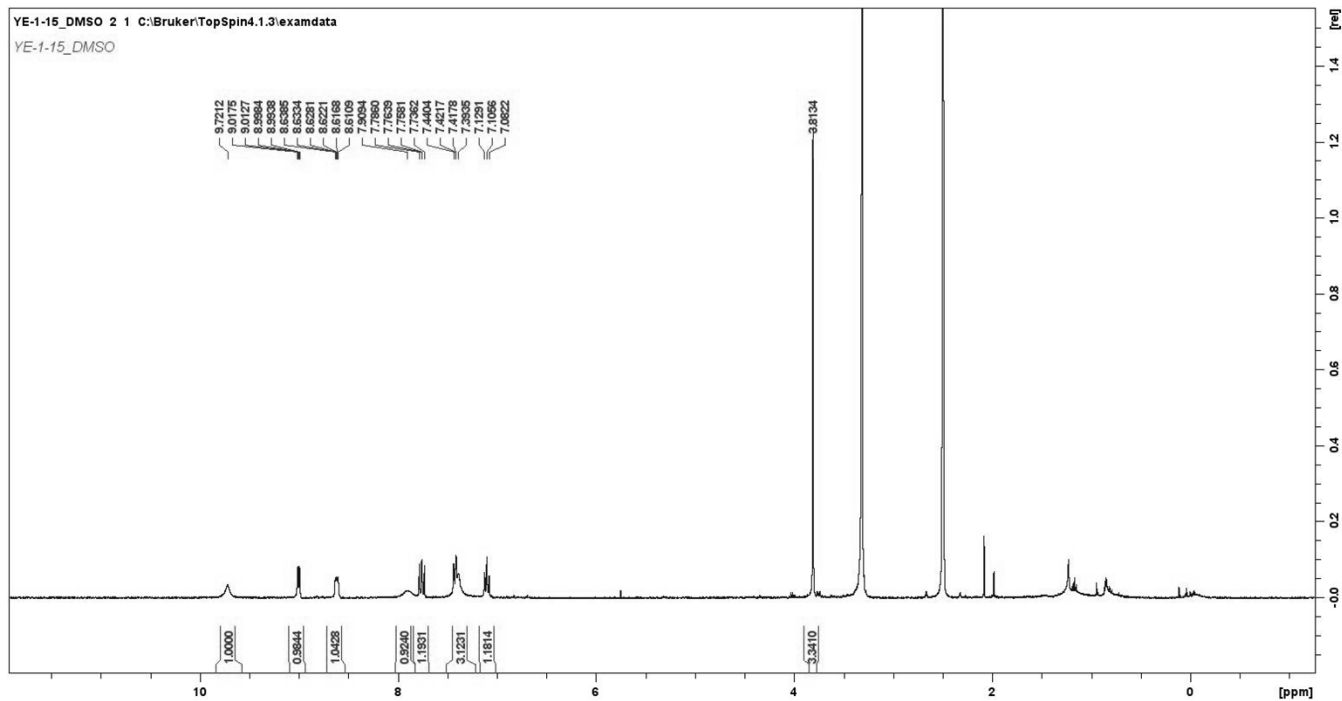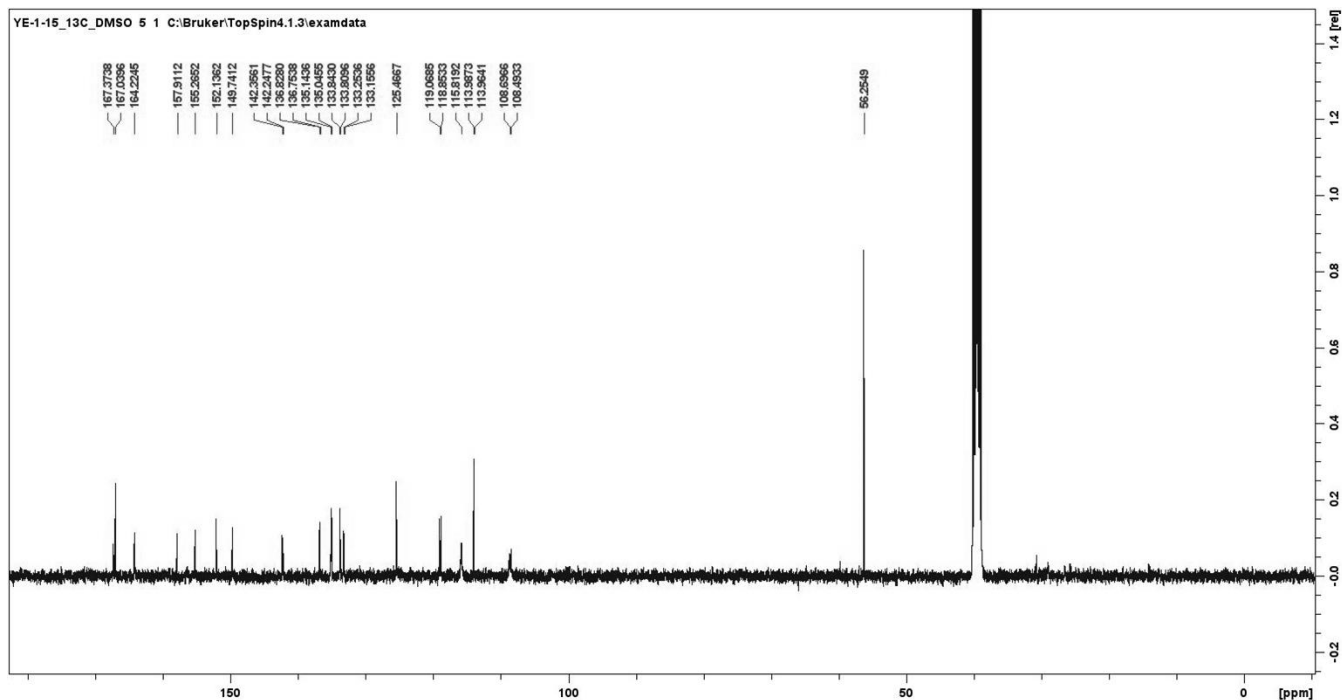

## Figure S2. HR-MS Copies of Compound **9a-g** and **11a-i**

4-(4-Amino-6-((3-fluoro-4-methoxyphenyl)amino)-1,3,5-triazin-2-yl)phenol (**9a**)

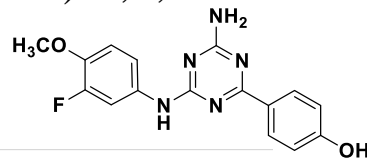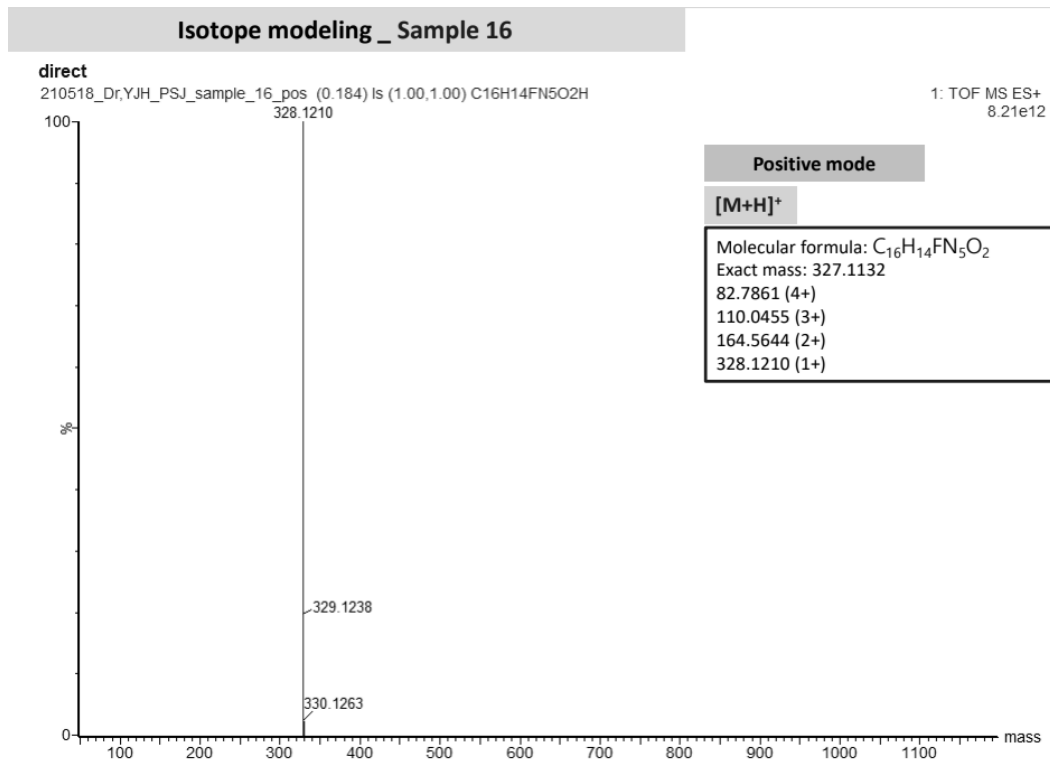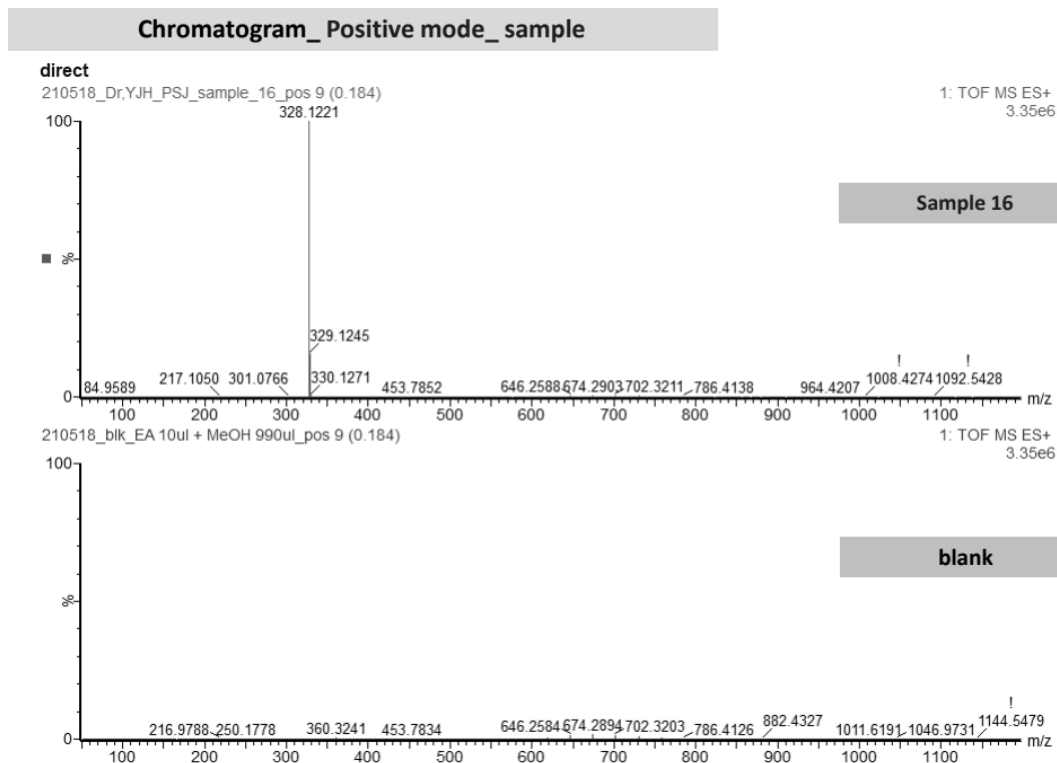

# 4-(4-Amino-6-((3,5-dimethoxyphenyl)amino)-1,3,5-triazin-2-yl)phenol (**9b**)



Isotope Modeling: KYC-4-53 (C<sub>17</sub>H<sub>17</sub>N<sub>5</sub>O<sub>3</sub>, Exact MS 339.1331)

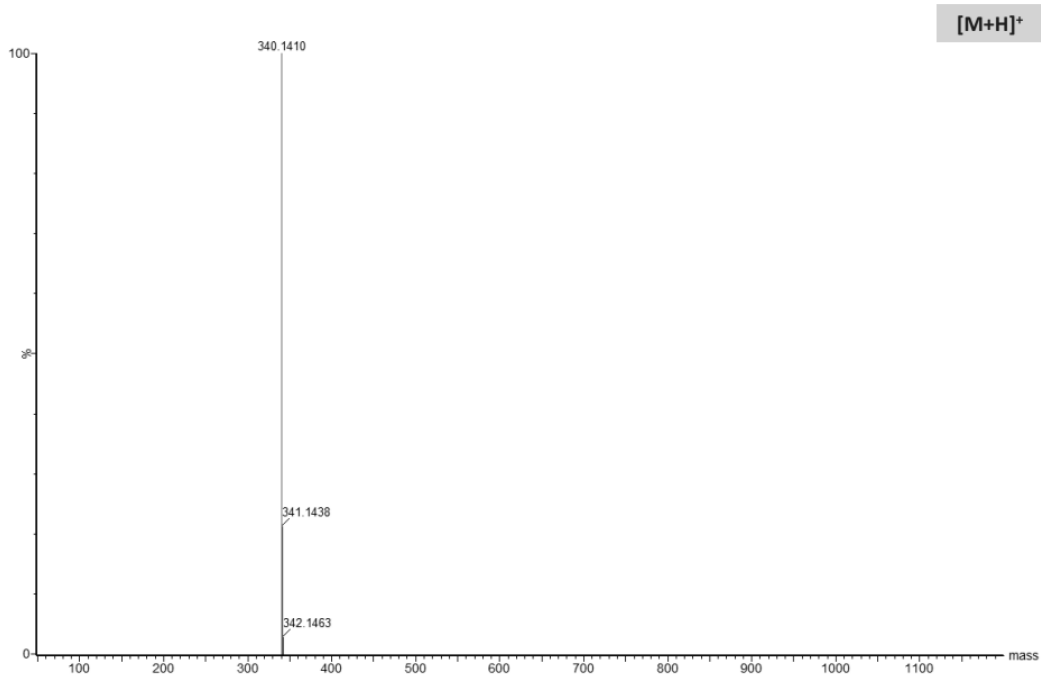

Mass Spectrum: KYC-4-53 (Positive mode)

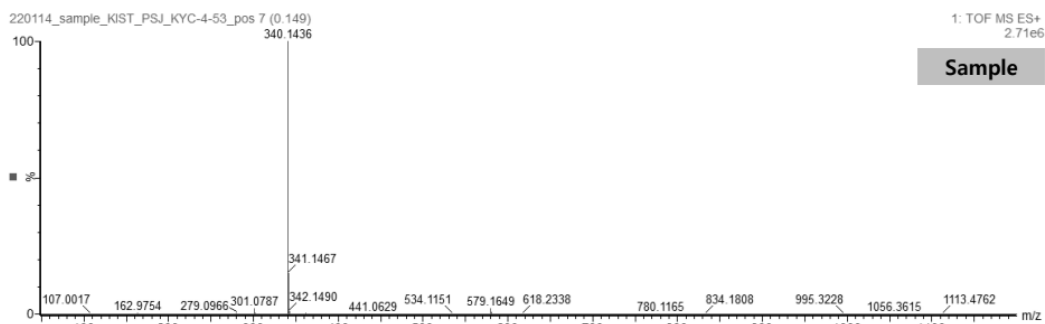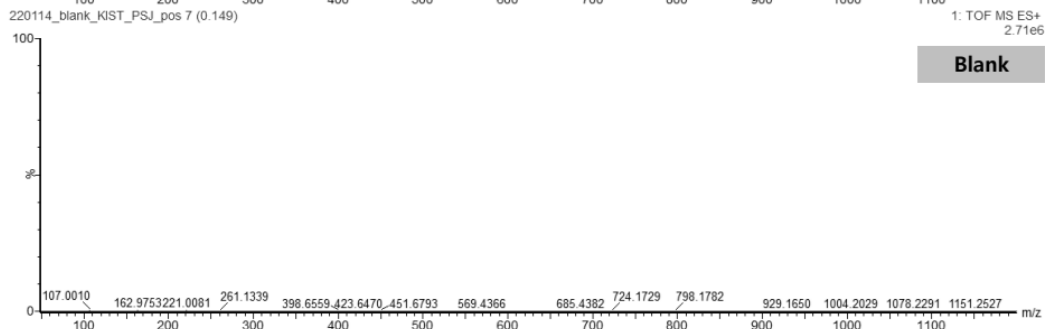

# 4-(4-Amino-6-((4-chloro-3-methoxyphenyl)amino)-1,3,5-triazin-2-yl)phenol (**9c**)

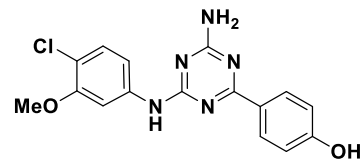

Isotope Modeling: KYC-4-58 (C<sub>16</sub>H<sub>14</sub>ClN<sub>5</sub>O<sub>2</sub>, Exact MS 343.0836)

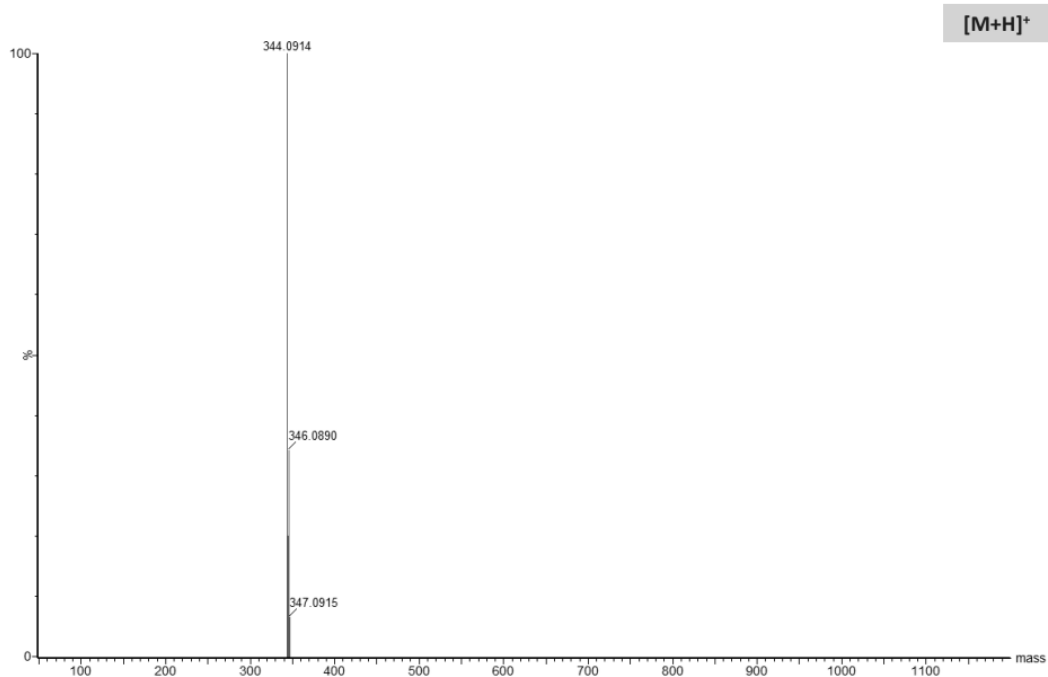

Mass Spectrum: KYC-4-58 (Positive mode)

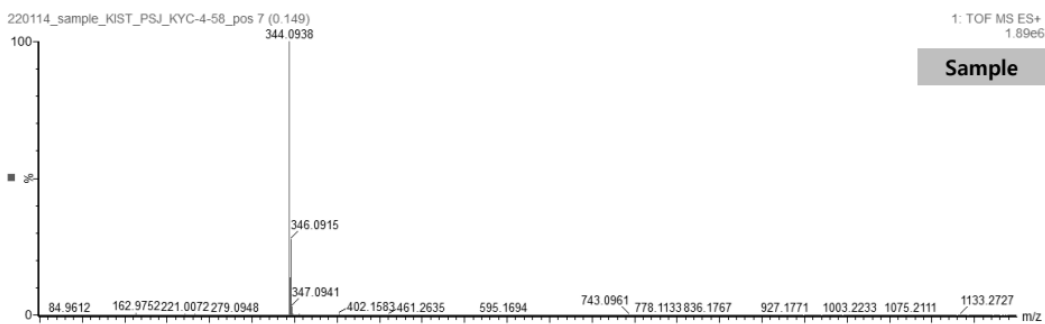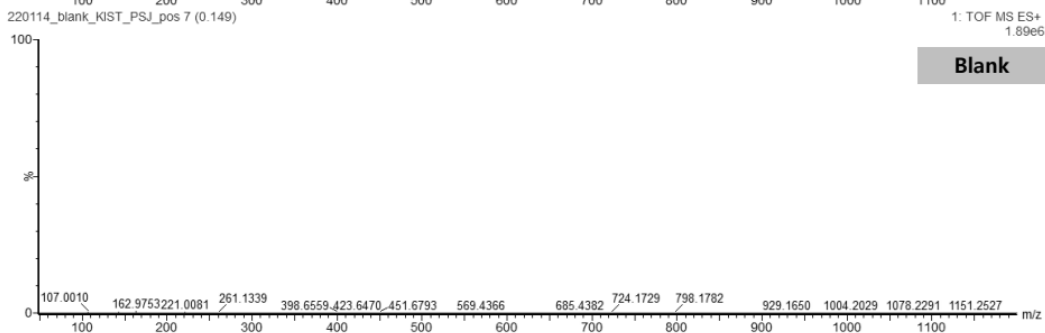

# 4-(4-Amino-6-((3-(trifluoromethyl)phenyl)amino)-1,3,5-triazin-2-yl)phenol (**9d**)



Isotope Modeling: KYC-4-63 (C<sub>16</sub>H<sub>12</sub>F<sub>3</sub>N<sub>5</sub>O, Exact MS 347.0994)

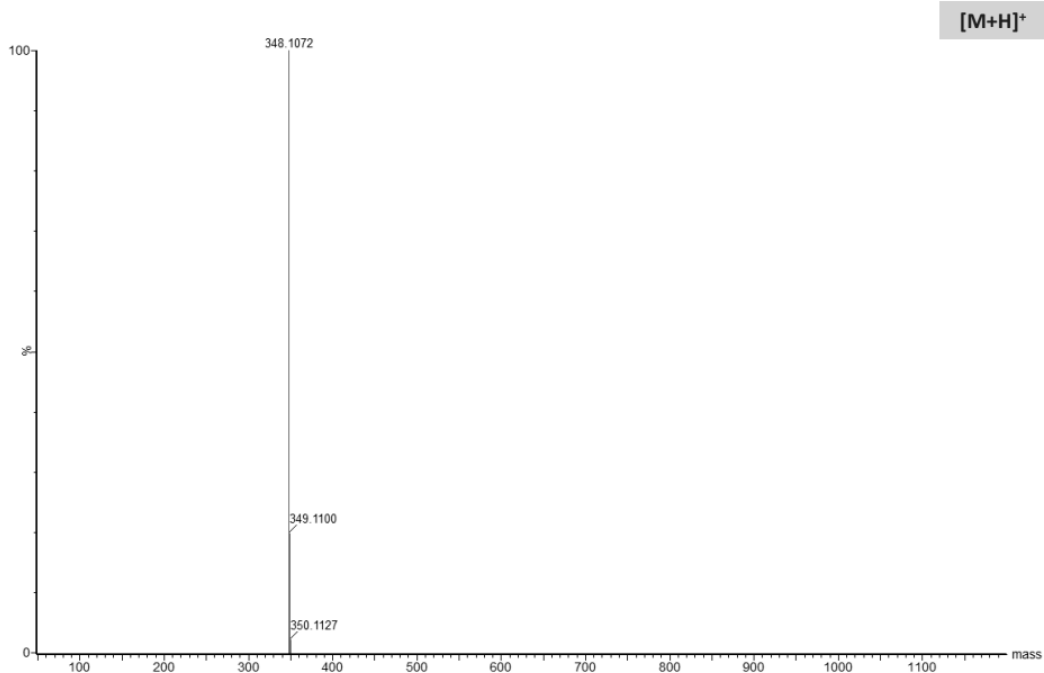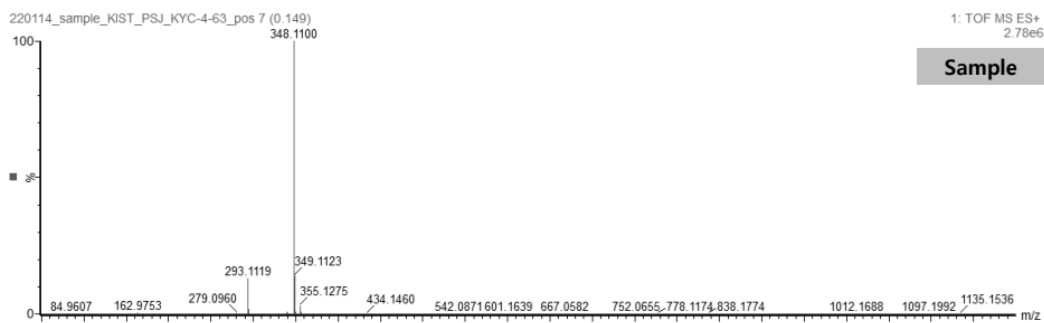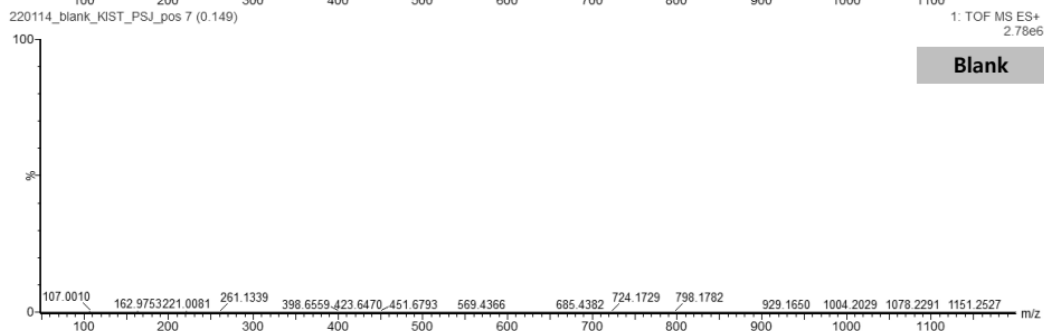

# 4-(4-Amino-6-((3,5-dimethylphenyl)amino)-1,3,5-triazin-2-yl)phenol (**9e**)

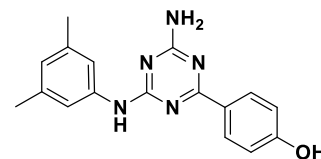

Isotope Modeling: KYC-4-69 (C<sub>17</sub>H<sub>17</sub>N<sub>5</sub>O, Exact MS 307.1433)

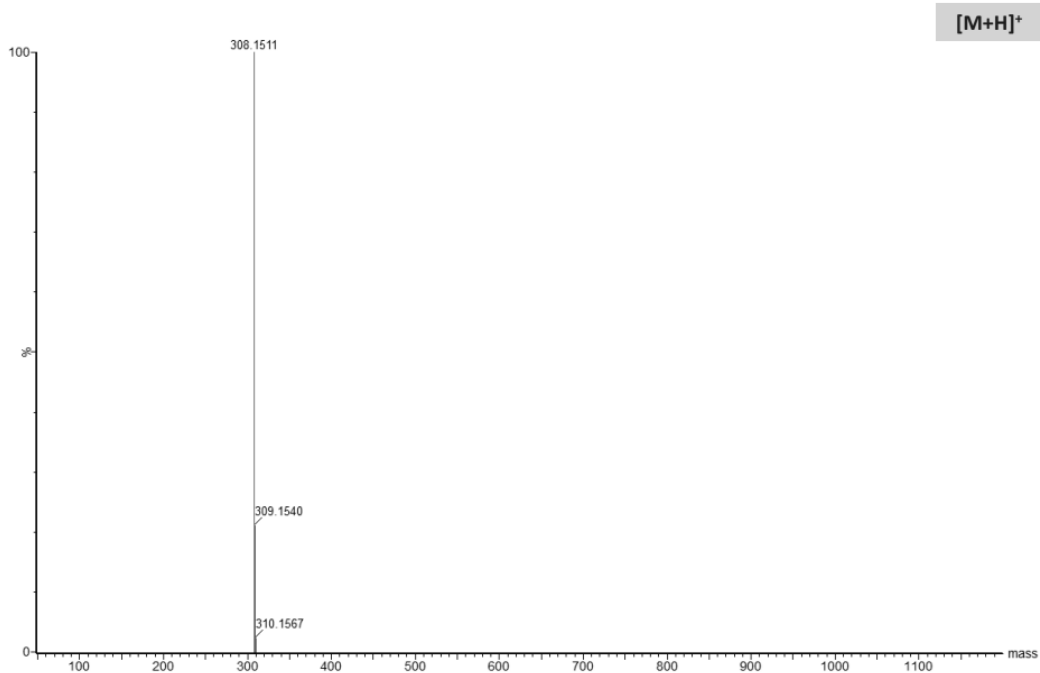

Mass Spectrum: KYC-4-69 (Positive mode)

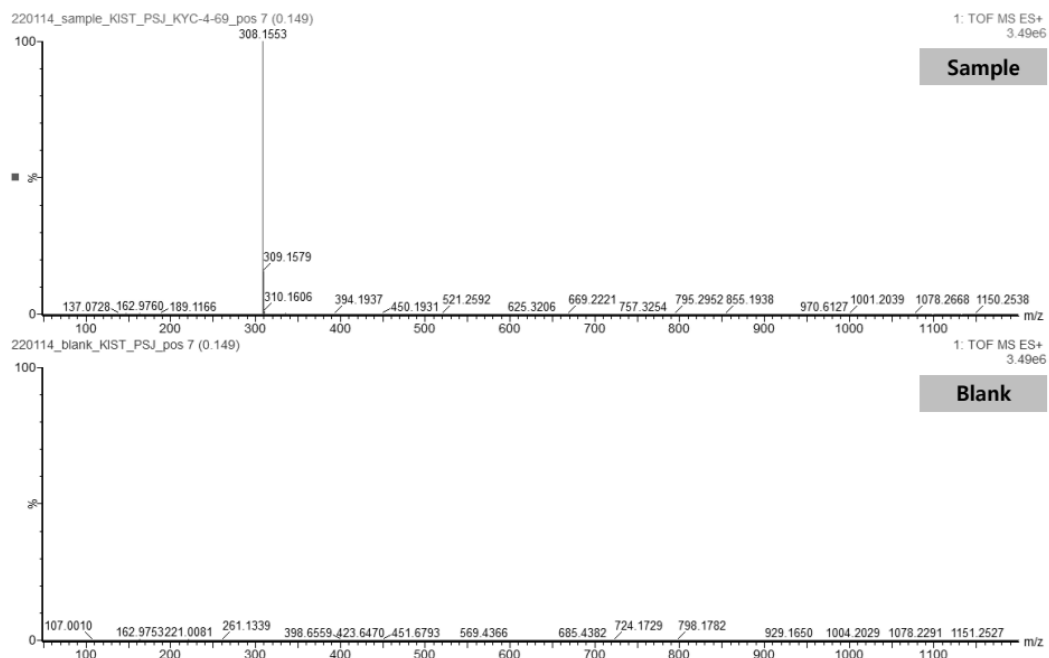

# 4-(4-Amino-6-((4-(piperidin-1-yl)phenyl)amino)-1,3,5-triazin-2-yl)phenol (**9f**)

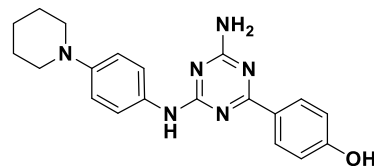

Isotope Modeling: KYC-4-79 (C<sub>20</sub>H<sub>22</sub>N<sub>6</sub>O, Exact MS 362.1855)

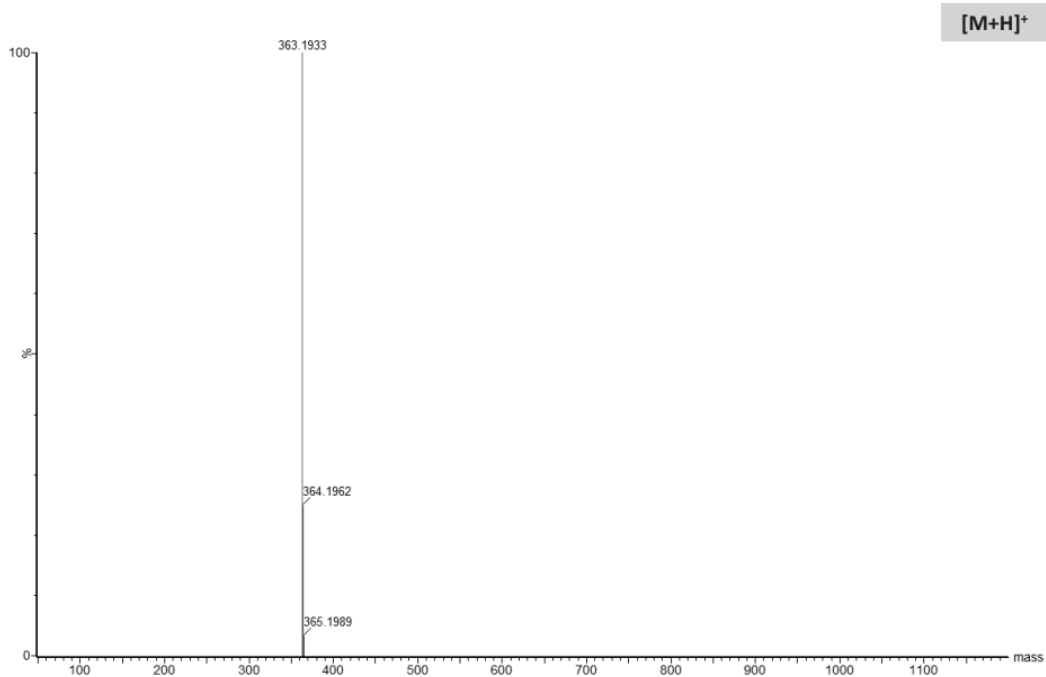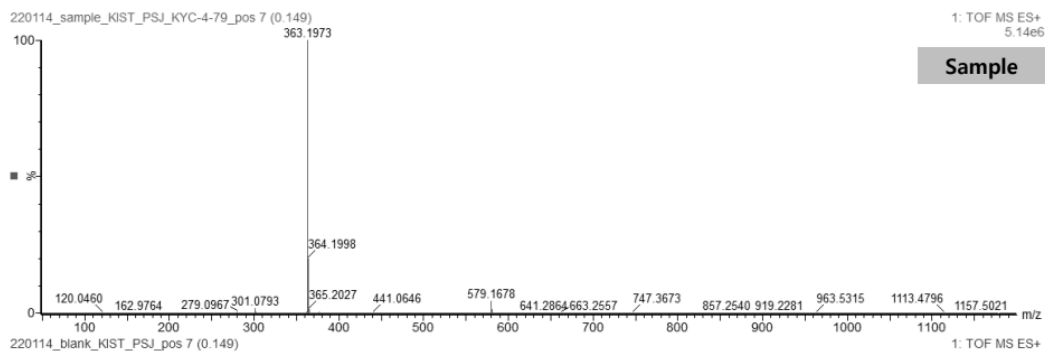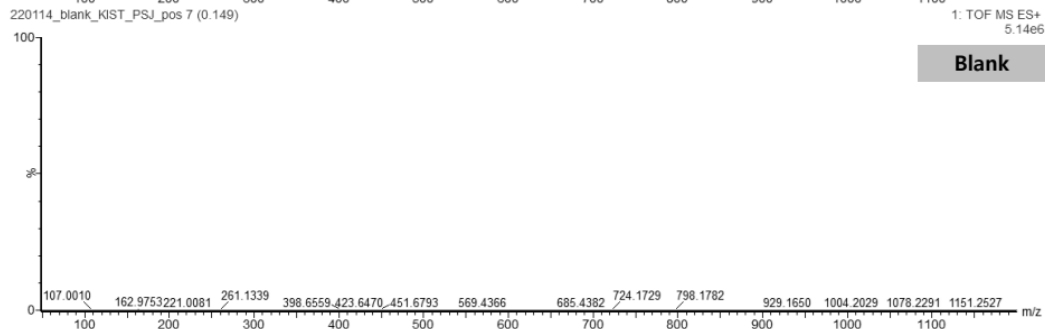

# 4-(4-Amino-6-((2,4-dimethylphenyl)amino)-1,3,5-triazin-2-yl)phenol (**9g**)

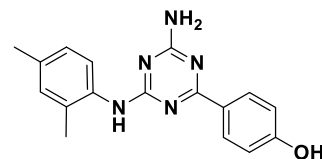

Isotope Modeling: KYC-4-82 (C<sub>17</sub>H<sub>17</sub>N<sub>5</sub>O, Exact MS 307.1433)

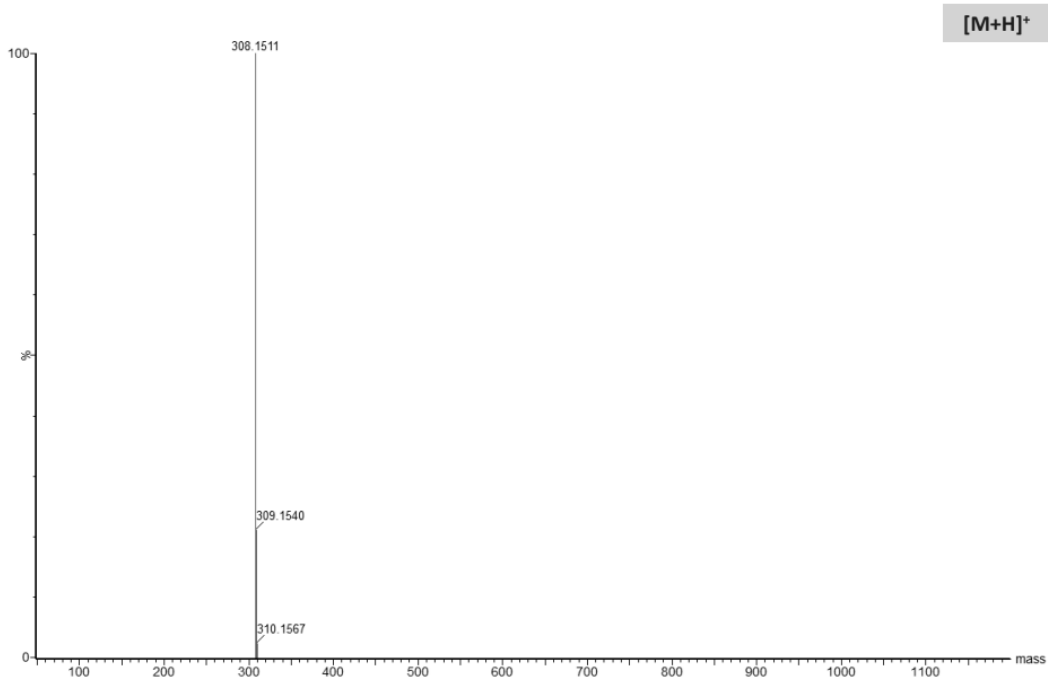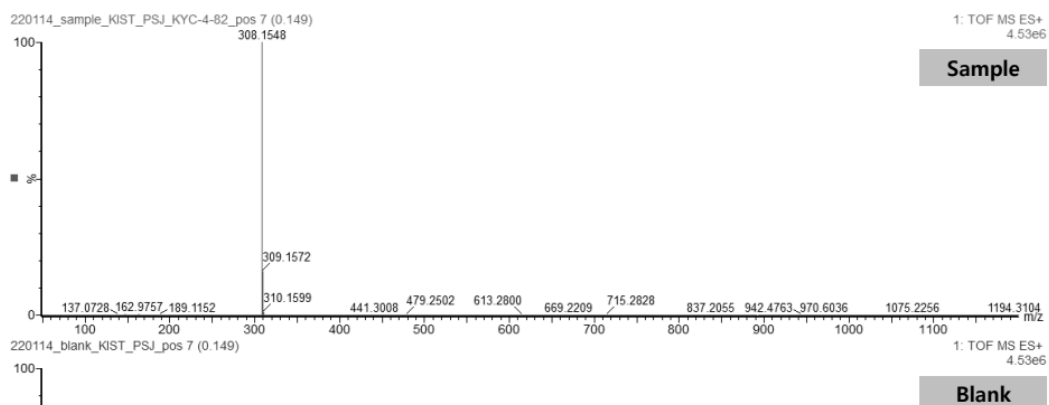



# $N^2$ -(3-Fluoro-4-methoxyphenyl)-6-(4-methoxyphenyl)-1,3,5-triazine-2,4-diamine (**11a**)

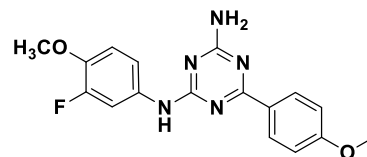

Compound Table

| Compound Label         | RT    | Mass     | Abund  | Formula         | Tgt Mass | Diff (ppm) |
|------------------------|-------|----------|--------|-----------------|----------|------------|
| Cpd 1: C17 H16 F N5 O2 | 0.242 | 341.1295 | 681105 | C17 H16 F N5 O2 | 341.1288 | 1.96       |

| Compound Label         | m/z      | RT    | Algorithm       | Mass     |
|------------------------|----------|-------|-----------------|----------|
| Cpd 1: C17 H16 F N5 O2 | 342.1368 | 0.242 | Find By Formula | 341.1295 |

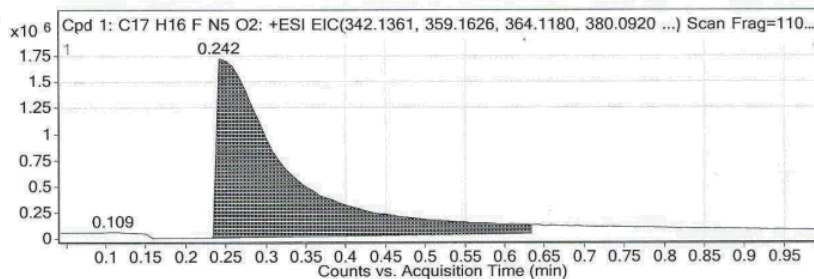

MS Spectrum

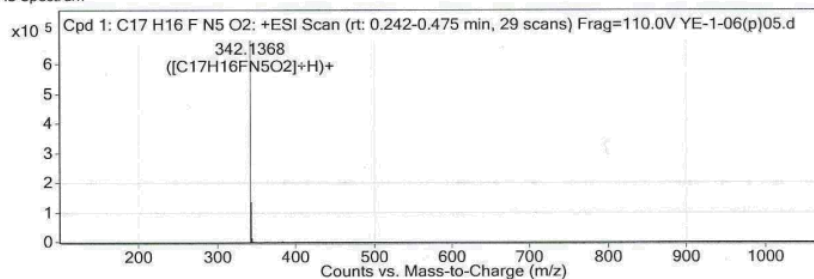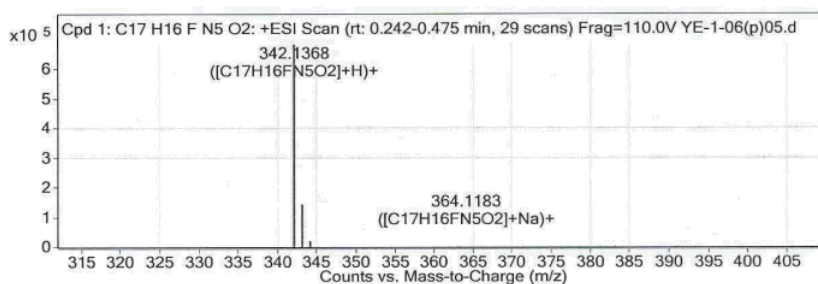

MS Spectrum Peak List

| m/z      | Calc m/z | Diff(ppm) | z | Abund     | Formula     | Ion     |
|----------|----------|-----------|---|-----------|-------------|---------|
| 342.1368 | 342.1361 | -2.13     | 1 | 681105.13 | C17H16FN5O2 | (M+H)+  |
| 343.1393 | 343.1389 | -1.15     | 1 | 135914.66 | C17H16FN5O2 | (M+H)+  |
| 344.1418 | 344.1415 | -0.93     | 1 | 12011.48  | C17H16FN5O2 | (M+H)+  |
| 345.1447 | 345.1439 | -2.33     | 1 | 1009.78   | C17H16FN5O2 | (M+H)+  |
| 364.1183 | 364.118  | -0.66     | 1 | 94.29     | C17H16FN5O2 | (M+Na)+ |
| 380.0932 | 380.092  | -3.17     | 1 | 62.38     | C17H16FN5O2 | (M+K)+  |

# $N^2$ -(3-Fluoro-4-methoxyphenyl)-6-(4-fluorophenyl)-1,3,5-triazine-2,4-diamine (**11b**)



## Isotope modeling \_ YE-1-07

direct

201215\_blk\_MeOH\_pos\_35 (0.044) Is (1.00,1.00) C<sub>16</sub>H<sub>13</sub>F<sub>2</sub>N<sub>5</sub>O

1: TOF MS ES+  
8.24e12

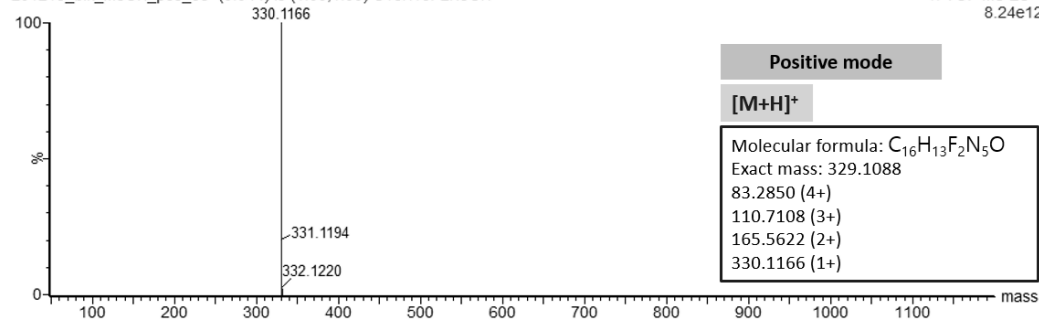

201215\_blk\_MeOH\_pos\_35 (0.184) Is (1.00,1.00) C<sub>16</sub>H<sub>12</sub>F<sub>2</sub>N<sub>5</sub>O

1: TOF MS ES+  
8.24e12

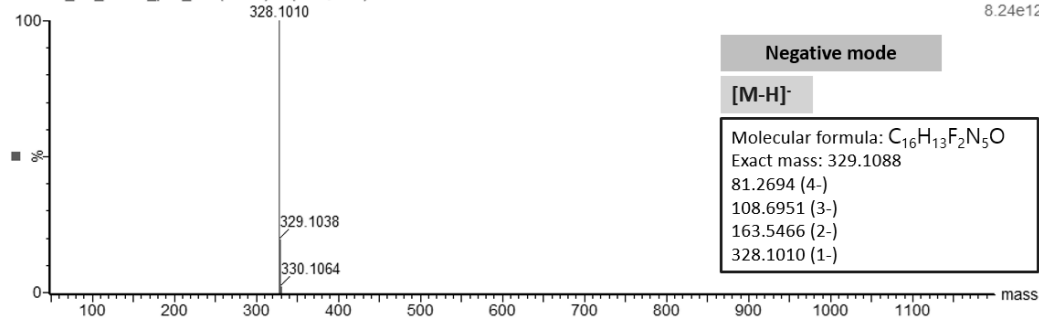

## Chromatogram\_ Negative mode\_ YE-1-07

direct

201217\_PSI\_YE-1-07\_neg 8 (0.166)

1: TOF MS ES-  
1.15e6

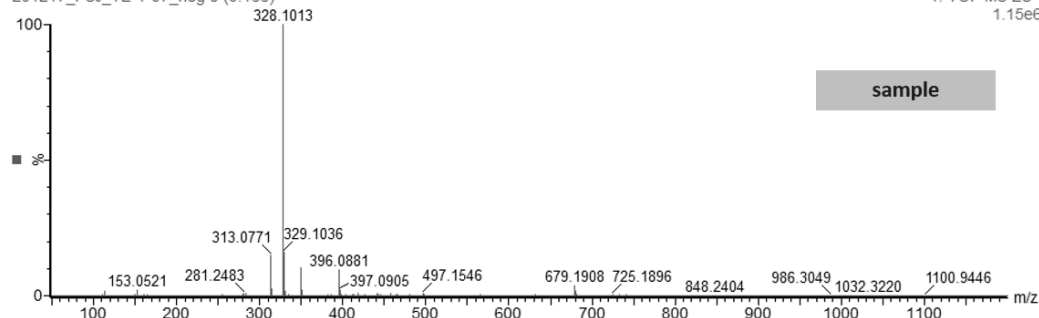

201217\_blk\_MeOH\_neg\_12 8 (0.166)

1: TOF MS ES-  
1.15e6

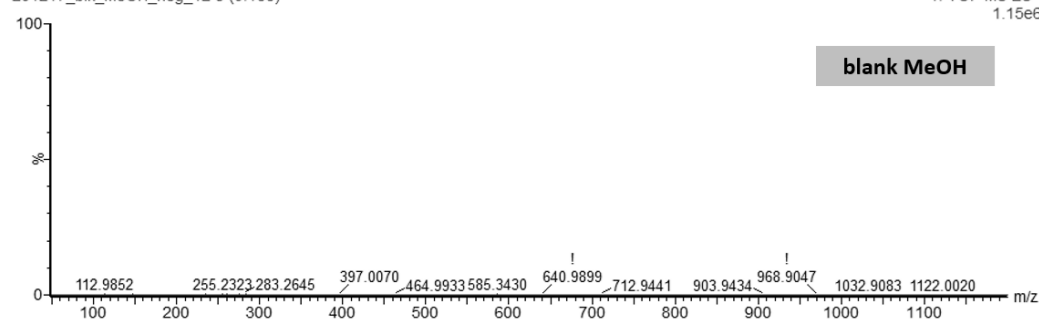

# $N^2$ -(3-Fluoro-4-methoxyphenyl)-6-(4-(trifluoromethoxy)phenyl)-1,3,5-triazine-2,4-diamine (**11c**)

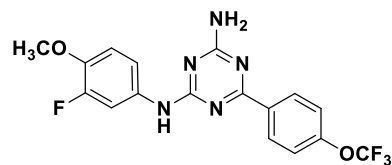

## Isotope modeling \_ YE-1-09

direct

201215\_blk\_MeOH\_pos\_35 (0.044) Is (1.00,1.00) C<sub>17</sub>H<sub>14</sub>F<sub>4</sub>N<sub>5</sub>O<sub>2</sub>

1: TOF MS ES+  
8.13e12

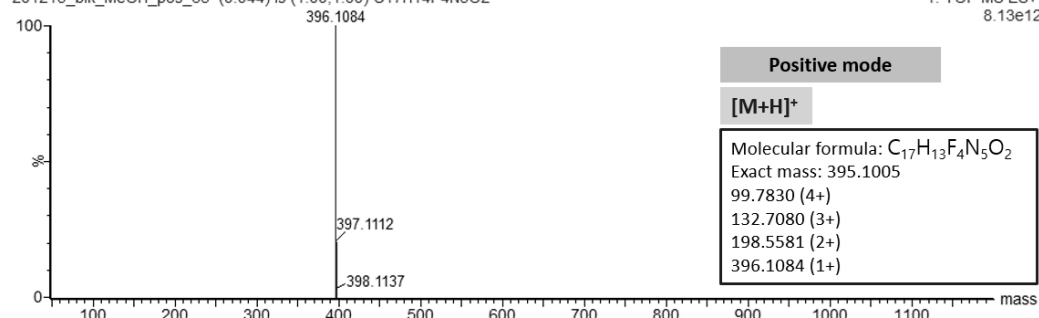

201215\_blk\_MeOH\_pos\_35 (0.184) Is (1.00,1.00) C<sub>17</sub>H<sub>12</sub>F<sub>4</sub>N<sub>5</sub>O<sub>2</sub>

1: TOF MS ES+  
8.13e12

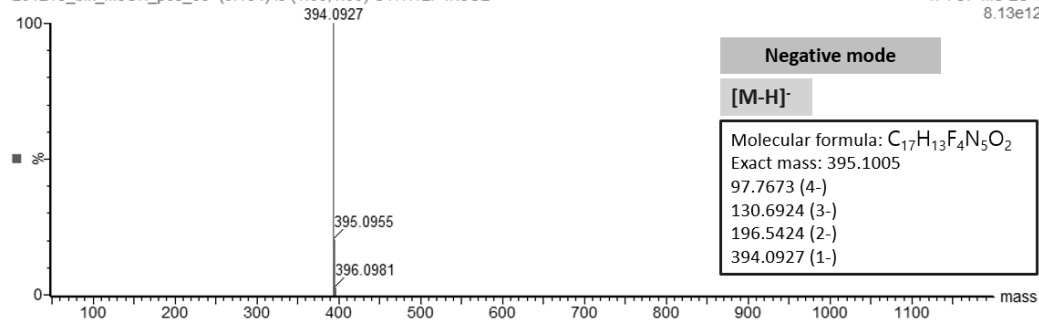

## Chromatogram\_ Negative mode\_ YE-1-09

direct

201217\_PsJ\_YE-1-09\_neg 8 (0.166)

1: TOF MS ES-  
2.36e6

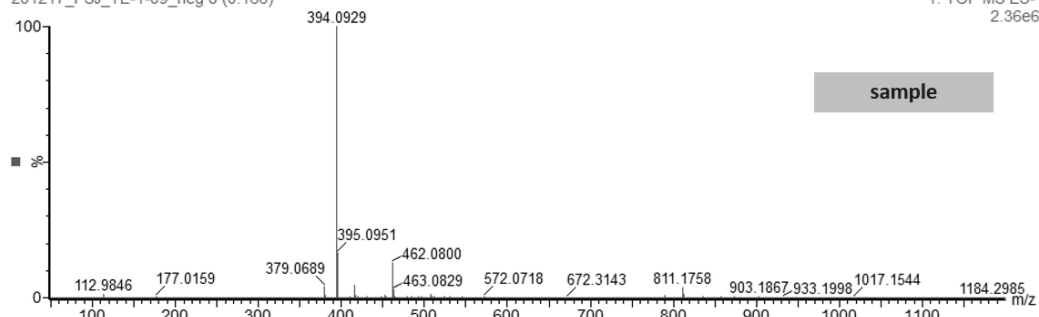

201217\_blk\_MeOH\_neg\_18 8 (0.166)

1: TOF MS ES-  
2.36e6

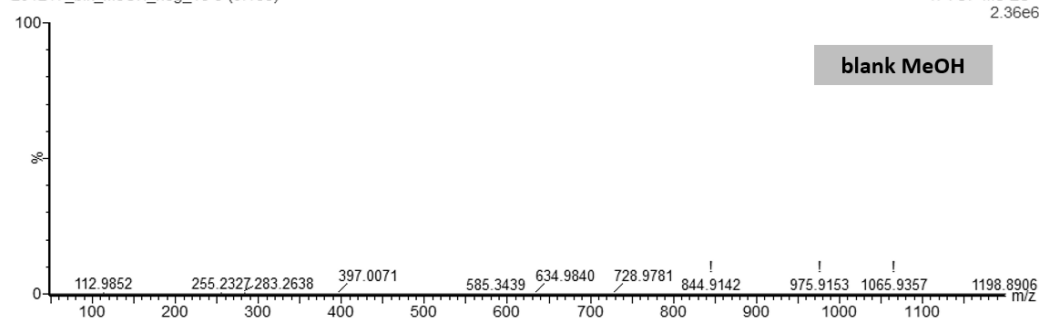

# $N^2$ -(3-Fluoro-4-methoxyphenyl)-6-(4-(trifluoromethyl)phenyl)-1,3,5-triazine-2,4-diamine (**11d**)

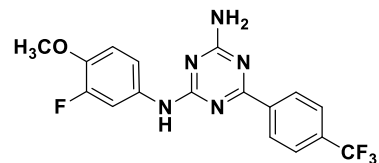

## Isotope modeling \_ YE-1-18

direct

201215\_blk\_MeOH\_pos\_35 (0.044) Is (1.00,1.00) C<sub>17</sub>H<sub>14</sub>F<sub>4</sub>N<sub>5</sub>O

1: TOF MS ES+  
8.15e12

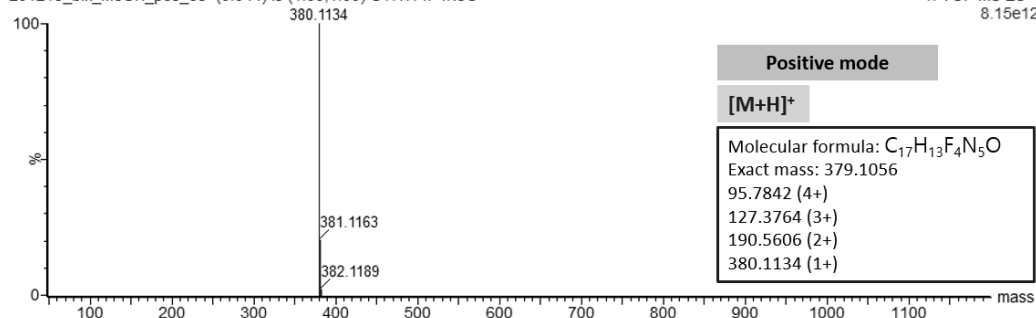

201215\_blk\_MeOH\_pos\_35 (0.184) Is (1.00,1.00) C<sub>17</sub>H<sub>12</sub>F<sub>4</sub>N<sub>5</sub>O

1: TOF MS ES+  
8.15e12

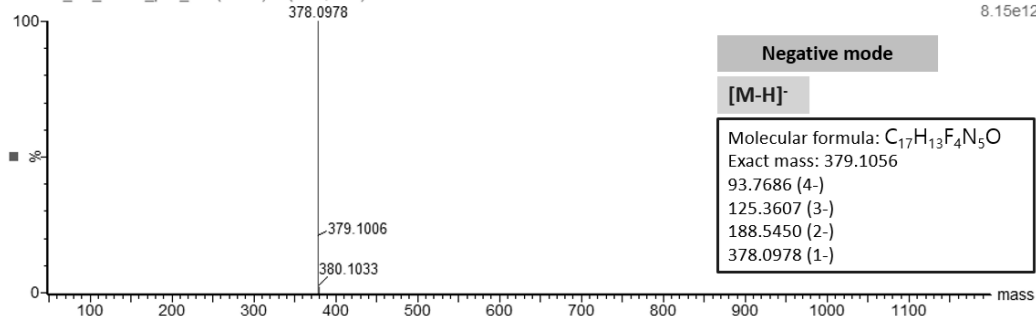

## Chromatogram\_ Negative mode\_ YE-1-18

direct

201217\_PSI\_YE-1-18\_neg 8 (0.166)

1: TOF MS ES-  
2.57e6

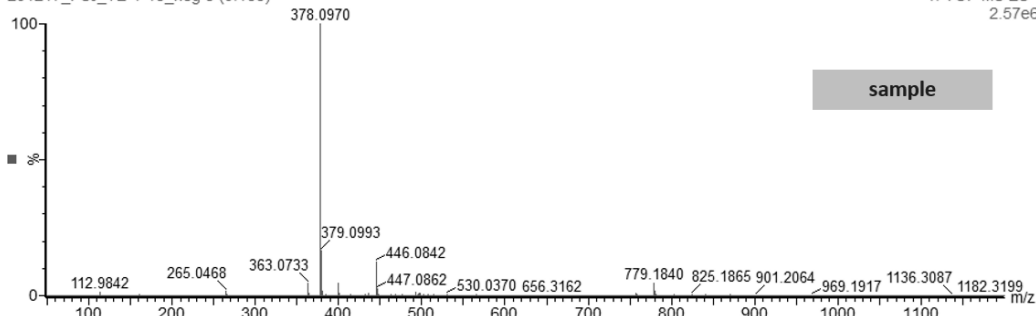

201217\_blk\_MeOH\_neg\_33 8 (0.166)

1: TOF MS ES-  
2.57e6

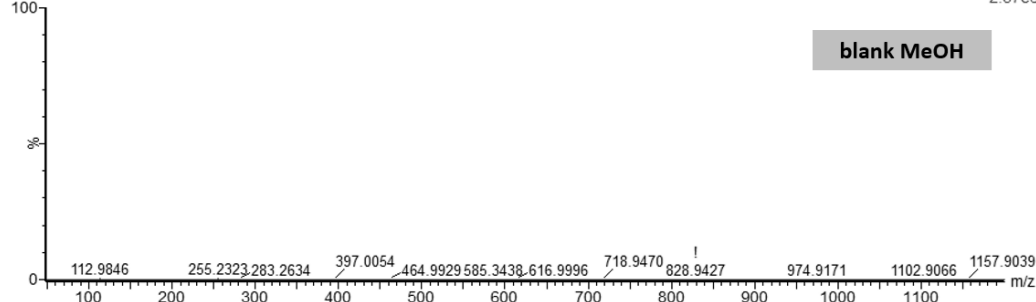

# 4-(4-Amino-6-((3-fluoro-4-methoxyphenyl)amino)-1,3,5-triazin-2-yl)benzonitrile (**11e**)

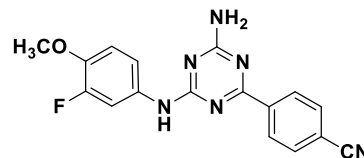

## Isotope modeling \_ YE-1-10

direct

201215\_blk\_MeOH\_pos\_35 (0.044) Is (1.00,1.00) C<sub>17</sub>H<sub>13</sub>FN<sub>6</sub>O

1: TOF MS ES+  
8.12e12

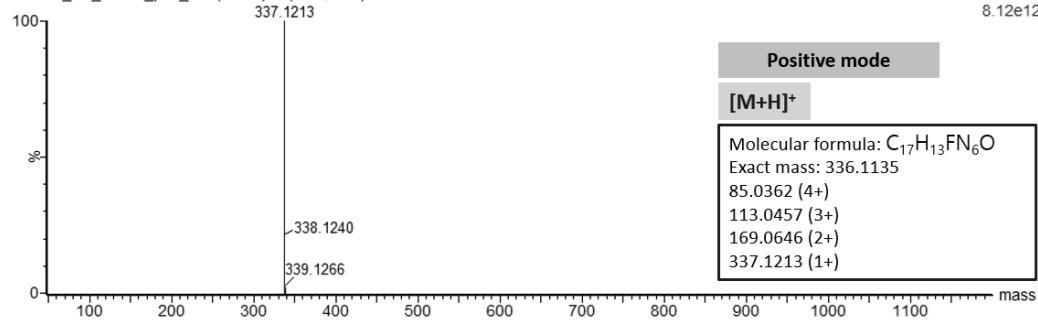

201215\_blk\_MeOH\_pos\_35 (0.184) Is (1.00,1.00) C<sub>17</sub>H<sub>12</sub>FN<sub>6</sub>O

1: TOF MS ES+  
8.12e12

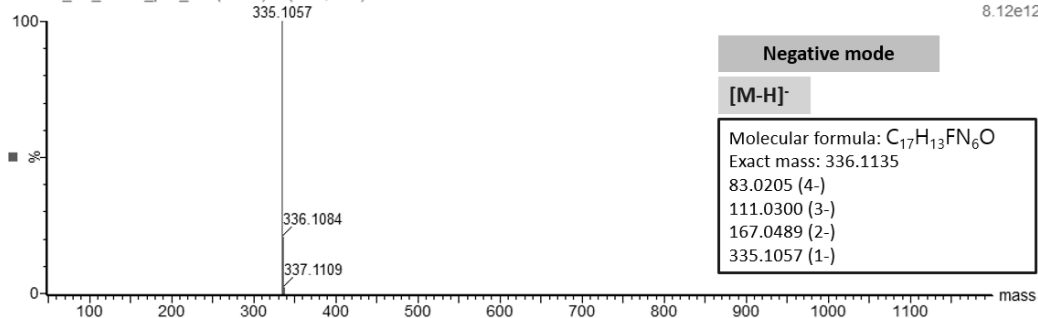

## Chromatogram\_ Negative mode\_ YE-1-10

direct

201217\_PJS\_YE-1-10\_neg 7 (0.149)

1: TOF MS ES-  
9.32e5

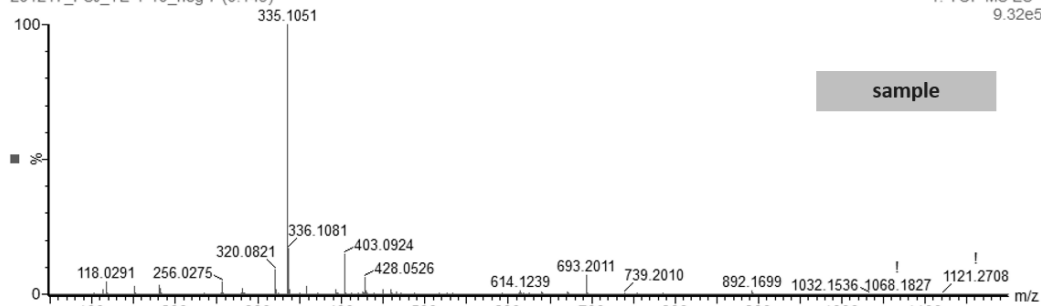

201217\_blk\_MeOH\_neg\_21 7 (0.149)

1: TOF MS ES-  
9.32e5

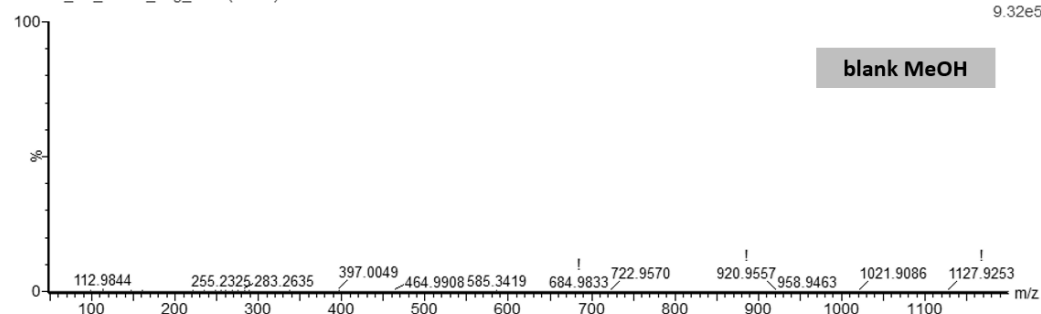

# Methyl 4-(4-Amino-6-((3-fluoro-4-methoxyphenyl)amino)-1,3,5-triazin-2-yl)benzoate (**11f**)

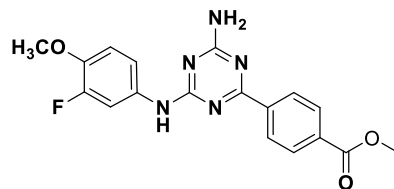

## Isotope modeling \_ YE-1-11

direct

201215\_blk\_MeOH\_pos\_35 (0.044) Is (1.00,1.00) C<sub>18</sub>H<sub>16</sub>FN<sub>5</sub>O<sub>3</sub>H

1: TOF MS ES+  
8.02e12

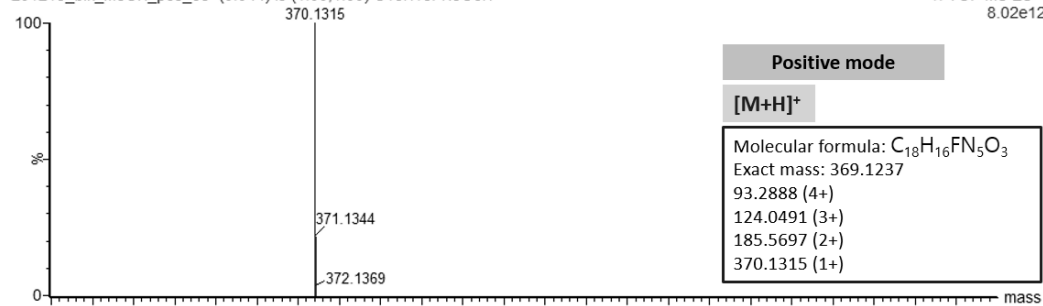

201215\_blk\_MeOH\_pos\_35 (0.184) Is (1.00,1.00) C<sub>18</sub>H<sub>15</sub>FN<sub>5</sub>O<sub>3</sub>

1: TOF MS ES+  
8.02e12

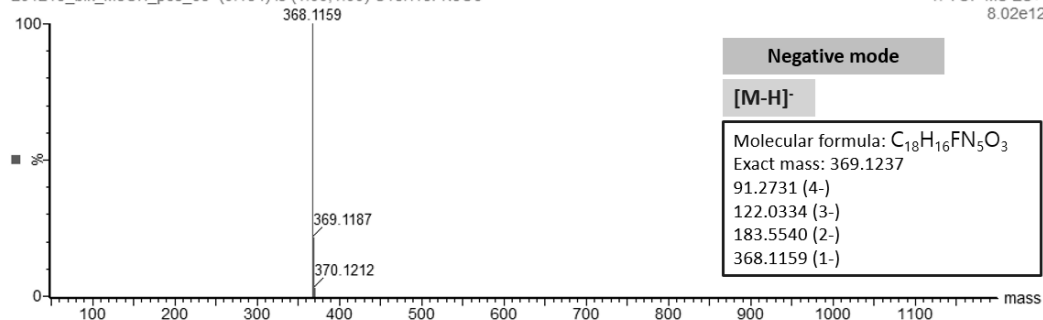

## Chromatogram\_ Negative mode\_ YE-1-11

direct

201217\_PsJ\_YE-1-11\_neg 8 (0.166)

1: TOF MS ES-  
5.74e5

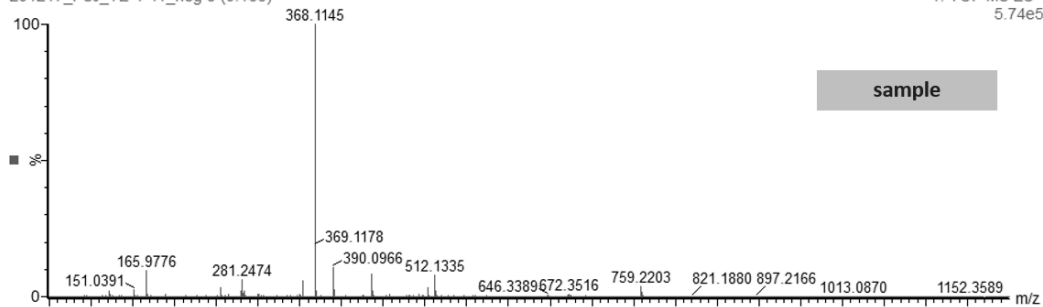

201217\_blk\_MeOH\_neg\_24 7 (0.149)

1: TOF MS ES-  
5.74e5

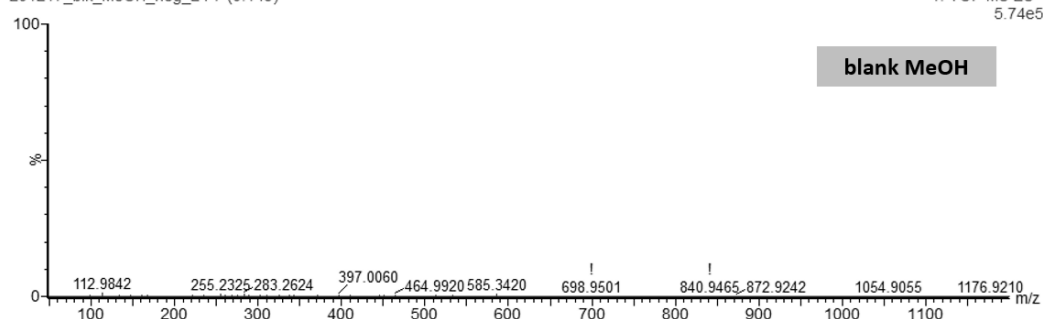

# Ethyl 4-(4-Amino-6-((3-fluoro-4-methoxyphenyl)amino)-1,3,5-triazin-2-yl)benzoate (**11g**)

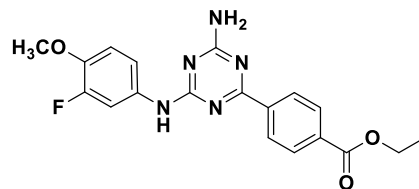

Compound Table

| Compound Label                                                         | RT    | Mass     | Abund | Formula                                                         | Tgt Mass | Diff (ppm) |
|------------------------------------------------------------------------|-------|----------|-------|-----------------------------------------------------------------|----------|------------|
| Cpd 1: C <sub>19</sub> H <sub>18</sub> F N <sub>5</sub> O <sub>3</sub> | 0.178 | 383.1395 | 25410 | C <sub>19</sub> H <sub>18</sub> F N <sub>5</sub> O <sub>3</sub> | 383.1394 | 0.4        |

| Compound Label                                                         | m/z      | RT    | Algorithm       | Mass     |
|------------------------------------------------------------------------|----------|-------|-----------------|----------|
| Cpd 1: C <sub>19</sub> H <sub>18</sub> F N <sub>5</sub> O <sub>3</sub> | 384.1468 | 0.178 | Find By Formula | 383.1395 |

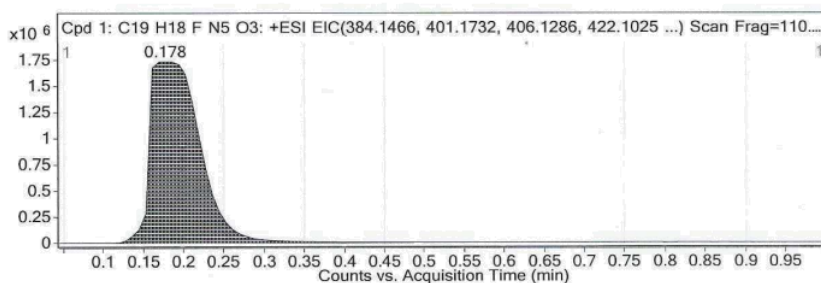

MS Spectrum

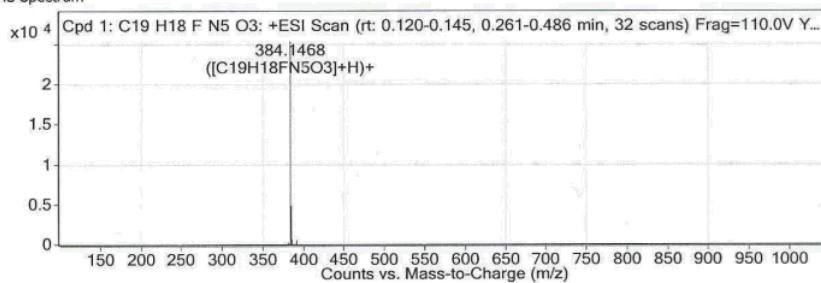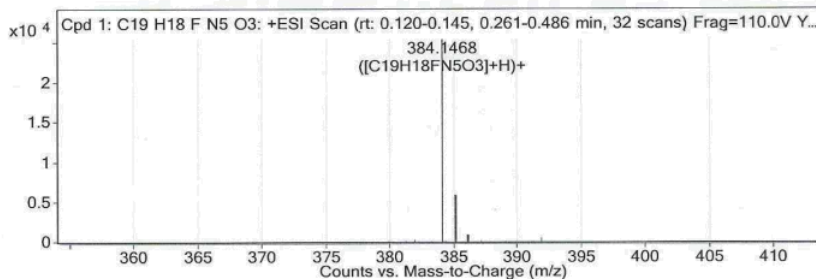

MS Spectrum Peak List

| m/z      | Calc m/z | Diff(ppm) | z | Abund    | Formula                                                        | Ion                |
|----------|----------|-----------|---|----------|----------------------------------------------------------------|--------------------|
| 384.1468 | 384.1466 | -0.43     | 1 | 25409.76 | C <sub>19</sub> H <sub>18</sub> FN <sub>5</sub> O <sub>3</sub> | (M+H) <sup>+</sup> |
| 385.1496 | 385.1495 | -0.17     | 1 | 4864.49  | C <sub>19</sub> H <sub>18</sub> FN <sub>5</sub> O <sub>3</sub> | (M+H) <sup>+</sup> |
| 386.1523 | 386.1521 | -0.52     | 1 | 582.88   | C <sub>19</sub> H <sub>18</sub> FN <sub>5</sub> O <sub>3</sub> | (M+H) <sup>+</sup> |
| 387.1566 | 387.1546 | -5.39     | 1 | 32.66    | C <sub>19</sub> H <sub>18</sub> FN <sub>5</sub> O <sub>3</sub> | (M+H) <sup>+</sup> |

# 4-(4-Amino-6-((3-fluoro-4-methoxyphenyl)amino)-1,3,5-triazin-2-yl)-2,6-difluorophenol (**11h**)

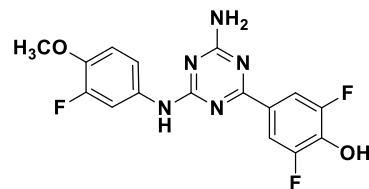

## Isotope modeling \_ YE-1-14

direct

201215\_blk\_MeOH\_pos\_35 (0.044) Is (1.00,1.00) C<sub>16</sub>H<sub>13</sub>F<sub>3</sub>N<sub>5</sub>O<sub>2</sub>

1: TOF MS ES+  
8.22e12

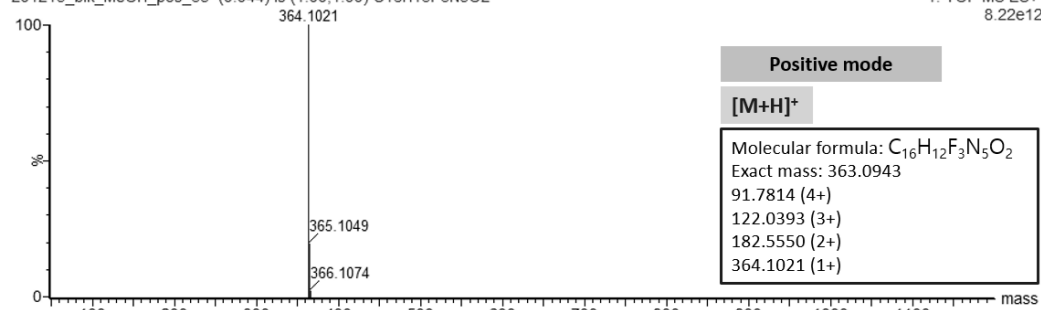

201215\_blk\_MeOH\_pos\_35 (0.184) Is (1.00,1.00) C<sub>16</sub>H<sub>11</sub>F<sub>3</sub>N<sub>5</sub>O<sub>2</sub>

1: TOF MS ES+  
8.22e12

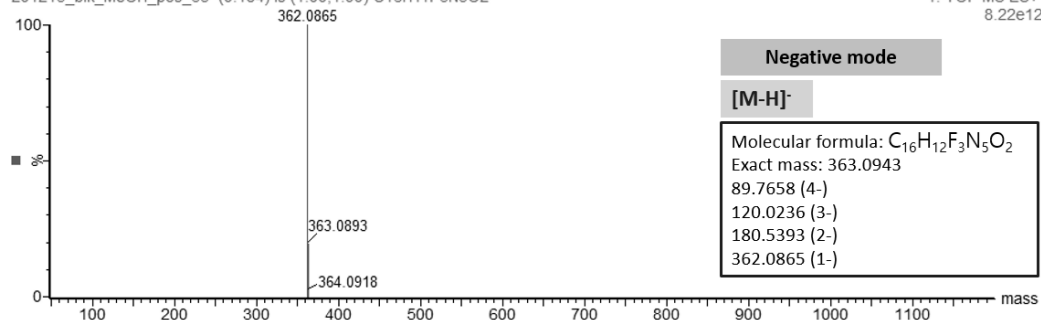

## Chromatogram\_ Negative mode\_ YE-1-14

direct

201217\_PSJ\_YE-1-14\_neg 7 (0.149)

1: TOF MS ES-  
6.19e6

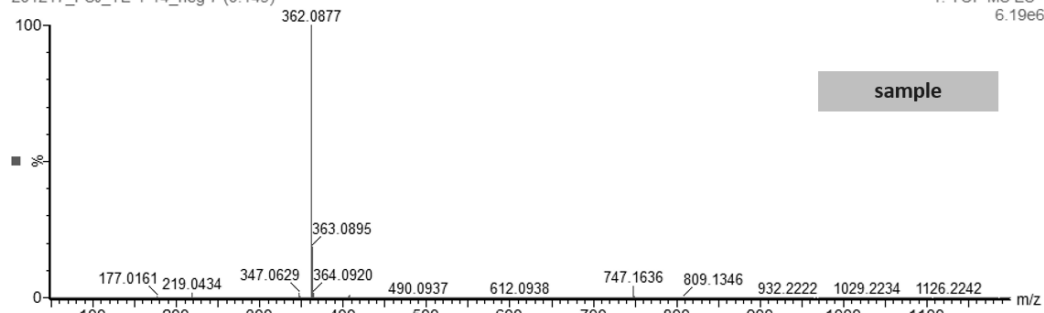

201217\_blk\_MeOH\_neg\_27 7 (0.149)

1: TOF MS ES-  
6.19e6

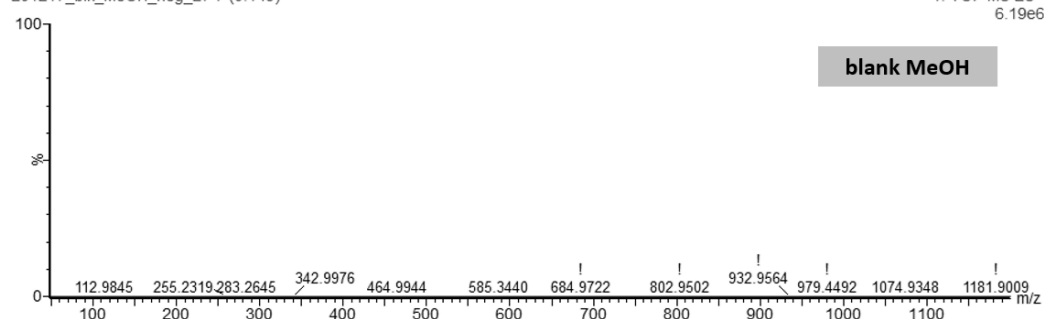



# 6-(4-Fluoro-3-nitrophenyl)-*N*<sup>2</sup>-(3-fluoro-4-methoxyphenyl)-1,3,5-triazine-2,4-diamine (**11i**)

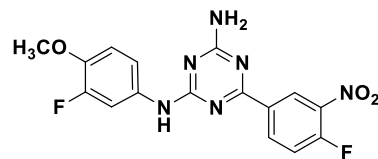

## Isotope modeling \_ YE-1-15

direct

201215\_blk\_MeOH\_pos\_35 (0.044) Is (1.00,1.00) C<sub>16</sub>H<sub>12</sub>F<sub>2</sub>N<sub>6</sub>O<sub>3</sub>H

1: TOF MS ES+  
8.17e12

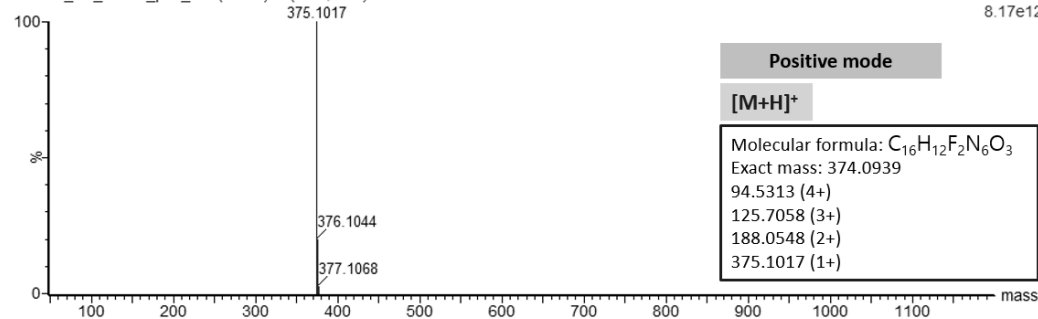

201215\_blk\_MeOH\_pos\_35 (0.184) Is (1.00,1.00) C<sub>16</sub>H<sub>11</sub>F<sub>2</sub>N<sub>6</sub>O<sub>3</sub>

1: TOF MS ES+  
8.17e12

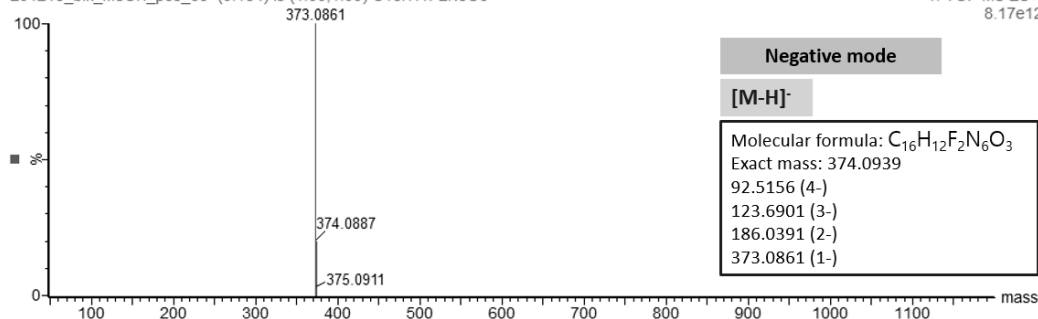

## Chromatogram\_ Negative mode\_ YE-1-15

direct

201217\_PSJ\_YE-1-15\_neg 8 (0.166)

1: TOF MS ES-  
1.04e6

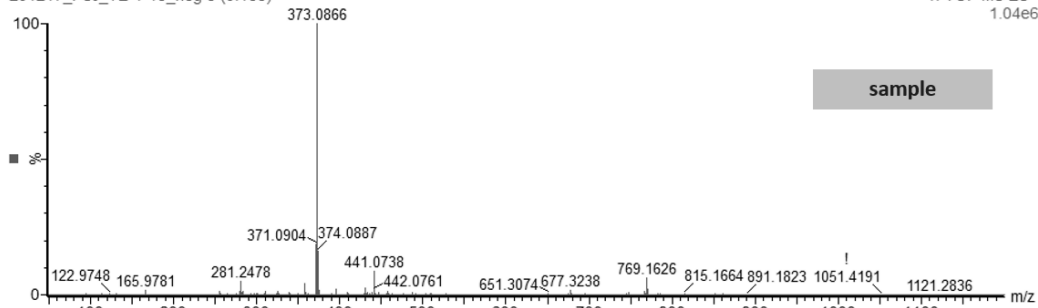

201217\_blk\_MeOH\_neg\_30 7 (0.149)

1: TOF MS ES-  
1.04e6

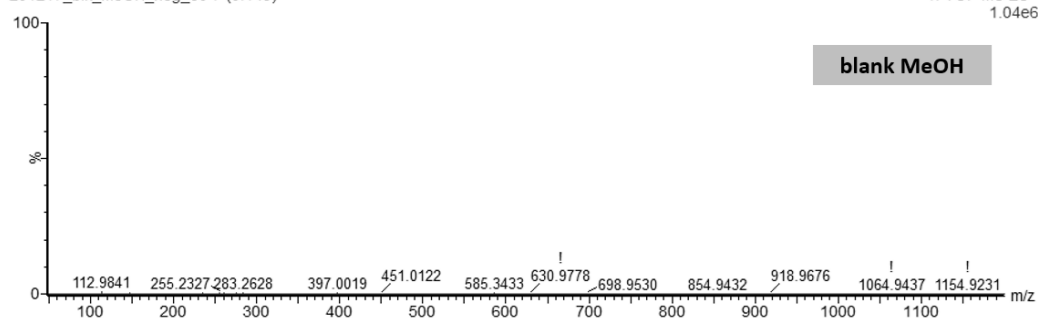

**Figure S3.** Molecular Docking of Compound **9a**, **11a**, and **11b**

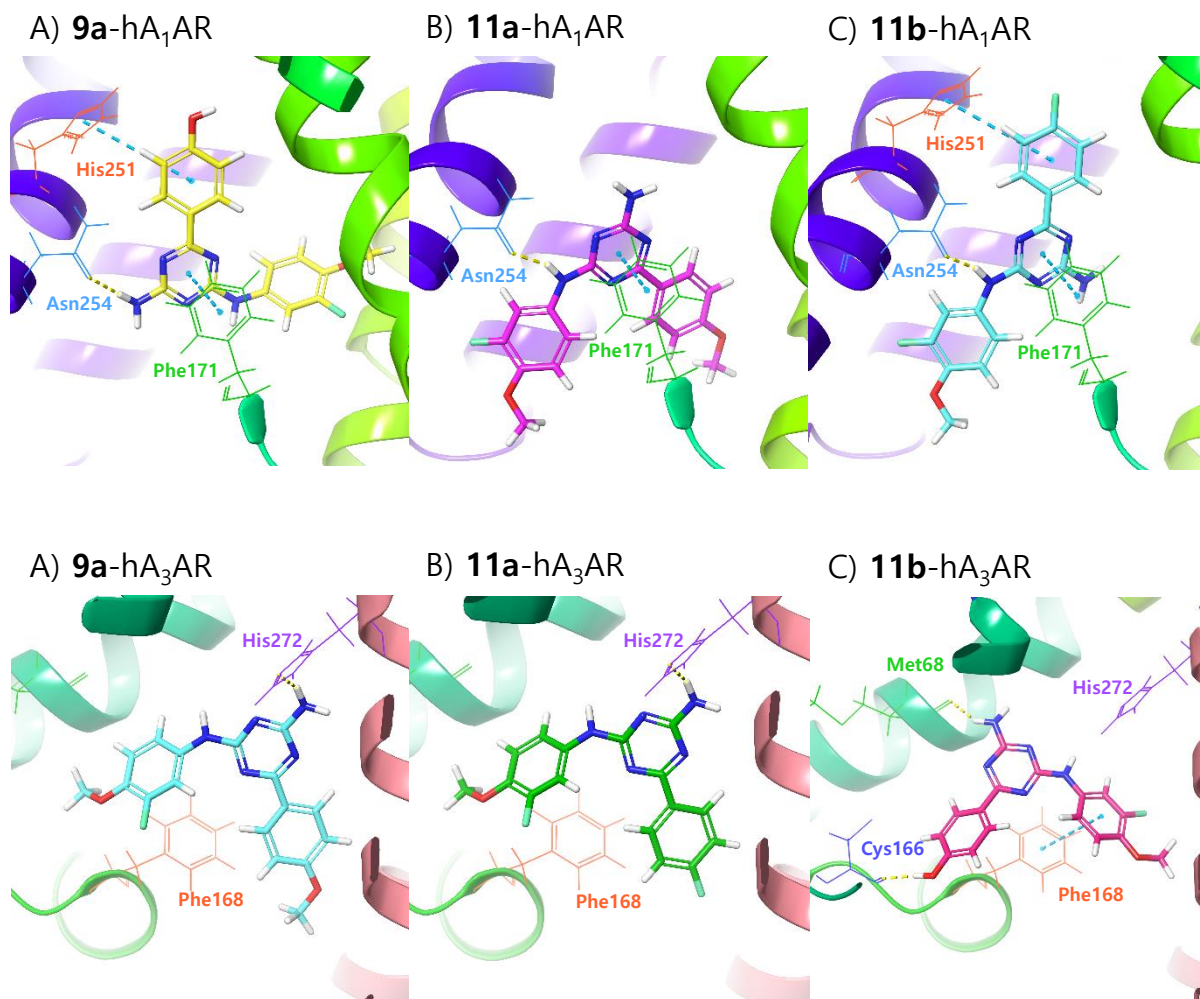

Supplement: s1 [file s1]
